# Supplementary material
Source: MDPI journal article supplement (https://www.mdpi.com/2073-4441/13/16/2283)
Supplement: s1 [file s1]

**Table S1.** List of PPCPs determined in Poland and their concentrations in environmental samples.

| PPCP group              | Compound     | Raw wastewater                                                |                                                                                                           | Treated wastewater                        |                                                                                              | Landfill leachate              |                                    | Surface water                                                                                                                          |                                                                                                                                                                                                                                               | Seawater |                    | Groundwater                |                                                              | Drinking water |                     |  |
|-------------------------|--------------|---------------------------------------------------------------|-----------------------------------------------------------------------------------------------------------|-------------------------------------------|----------------------------------------------------------------------------------------------|--------------------------------|------------------------------------|----------------------------------------------------------------------------------------------------------------------------------------|-----------------------------------------------------------------------------------------------------------------------------------------------------------------------------------------------------------------------------------------------|----------|--------------------|----------------------------|--------------------------------------------------------------|----------------|---------------------|--|
|                         |              | ng/L                                                          | Location, [source]                                                                                        | ng/L                                      | Location, [source]                                                                           | ng/L                           | Location, [source]                 | ng/L                                                                                                                                   | Location, [source]                                                                                                                                                                                                                            | ng/L     | Location, [source] | ng/L                       | Location, [source]                                           | ng/L           | Location, [source]  |  |
| Alkylphenols            | Bisphenol A  | 787.6–5927.5<br>10–12,060<br>1465<br>1194<br>782<br><LOD–<LOQ | Kraków, [71,85]<br>not given, [50,78]<br>Gdańsk, [90]<br>Gniewino, [90]<br>Swarzewo, [90]<br>Gdynia, [69] | 30.2–190<br><LOD–10,840<br>42<br>16<br>61 | Kraków, [71,85,92]<br>not given, [50,78]<br>Gdańsk, [90]<br>Gniewino, [90]<br>Swarzewo, [90] | <LOD–115,810<br><LOQ–2,202,000 | NE Poland, [50]<br>NW Poland, [69] | <LOQ<br>1–427<br>107<br>3113<br>798<br>207<br>71.6–514.9<br>16.3–30.1                                                                  | Warta, [81]<br>Southern Poland Streams, [106]<br>Oruński Stream, [90]<br>Kozacki Stream, [90]<br>Świątokrzyska I reservoir, [90]<br>Świątokrzyska II reservoir, [90]<br>Drwina, [71]<br>Vistula, [71]                                         |          |                    | <LOQ<br>1–629<br><LOD–6880 | Krajkowo, [81]<br>South Poland, [106]<br>NE Poland, [50,111] | 6–53           | South Poland, [106] |  |
|                         | Bisphenol S  | 1249<br>595<br>1045                                           | Gdańsk, [90]<br>Gniewino, [90]<br>Swarzewo, [90]                                                          | 10<br><LOD<br><LOD                        | Gdańsk [90]<br>Gniewino, [90]<br>Swarzewo, [90]                                              |                                |                                    | <LOQ<br>122<br>>LOD<br>1584<br>>LOD                                                                                                    | Warta, [81]<br>Oruński Stream, [90]<br>Kozacki Stream, [90]<br>Świątokrzyska I reservoir, [90]<br>Świątokrzyska II reservoir, [90]                                                                                                            |          |                    | <LOQ                       | Krajkowo, [81]                                               |                |                     |  |
|                         | Nonylphenol  | 1190–9560<br><LOD–102,540                                     | Silesia region, [89]<br>not given, [78]                                                                   | <LOD–1550<br><LOD–880                     | Silesia region, [89]<br>not given, [78]                                                      |                                |                                    |                                                                                                                                        |                                                                                                                                                                                                                                               |          |                    |                            |                                                              |                |                     |  |
|                         | Octylphenol  | 930–6600<br><LOD–2350                                         | Silesia region, [89]<br>not given, [78]                                                                   | 150–2380<br><LOD–2280                     | Silesia region, [89]<br>not given, [78]                                                      |                                |                                    |                                                                                                                                        |                                                                                                                                                                                                                                               |          |                    |                            |                                                              |                |                     |  |
| Alpha1–blockers         | Alfuzosin    |                                                               |                                                                                                           |                                           |                                                                                              |                                |                                    | <LOQ                                                                                                                                   | Warta, [81]                                                                                                                                                                                                                                   |          |                    | <LOQ                       | Krajkowo, [81]                                               |                |                     |  |
|                         | Carvedilol   |                                                               |                                                                                                           | <LOD                                      | Bielsko–<br>Biała,[75,91]                                                                    |                                |                                    | <LOD<br><LOD<br><LOD<br><LOD<br><LOD<br><LOD<br><LOD<br><LOD<br><LOD                                                                   | Vistula [75,91]<br>Odra, [75,91]<br>Warta, [75,91]<br>Brda, [75,91]<br>Kłodnica, [75,91]<br>Krzywa, [75,91]<br>Mała Panew, [75,91]<br>Troja, [75,91]<br>Toszecki Stream, [75,91]                                                              |          |                    |                            |                                                              |                |                     |  |
| Antiarrhythmic<br>drugs | Amiodarone   |                                                               |                                                                                                           |                                           |                                                                                              |                                |                                    | <LOD                                                                                                                                   | Vistula, [70]                                                                                                                                                                                                                                 |          |                    |                            |                                                              | <LOD           | Warsaw, [70]        |  |
|                         | Diltiazem    |                                                               |                                                                                                           |                                           |                                                                                              |                                |                                    | <LOQ<br><LOD–24                                                                                                                        | Warta, [81,98]<br>Vistula, [70]                                                                                                                                                                                                               |          |                    | <LOQ                       | Krajkowo, [81]                                               | <LOD–1.4       | Warsaw, [70]        |  |
|                         | Propafenone  |                                                               |                                                                                                           |                                           |                                                                                              |                                |                                    | <LOD–87                                                                                                                                | Vistula, [70]                                                                                                                                                                                                                                 |          |                    |                            |                                                              | <LOD–4         | Warsaw, [70]        |  |
| Antibacterial<br>agents | Triclocarban |                                                               |                                                                                                           |                                           |                                                                                              |                                |                                    | <LOQ                                                                                                                                   | Warta, [81]                                                                                                                                                                                                                                   |          |                    | <LOQ                       | Krajkowo, [81]                                               |                |                     |  |
|                         | Triclosan    | 166–6721.7<br><LOD–1330                                       | Kraków, [71,84,85]<br>not given, [50,78]                                                                  | 49.8–430<br><LOD–910                      | Kraków, [71,84,85]<br>not given, [50,78]                                                     | <LOD–260                       | NE Poland, [50]                    | <LOQ<br><LOQ–47.50<br><LOD–144<br><LOQ–45.12<br>29.08–92.10<br>32.99–87.36<br>52.5–271.5                                               | Warta, [81]<br>Wierzyca, [80]<br>Vistula, [71,74,80]<br>Łeba, [80]<br>Dębogórze Canal, [80]<br>Kozi Bród, [80]<br>Drwina, [71]                                                                                                                |          |                    | <LOQ<br><LOD–210           | Krajkowo, [81]<br>NE Poland, [50,111]                        | <LOD–11        | Warsaw, [74]        |  |
| Antibiotics             | Amoxicillin  |                                                               |                                                                                                           |                                           |                                                                                              |                                |                                    | <LOQ<br><LOQ<br><LOQ–19.66<br>14.69–35.67<br><LOQ–45.87<br>28.15–34.10<br><LOQ<br><LOQ<br><LOQ<br><LOQ<br><LOQ<br><LOQ<br><LOQ<br><LOQ | Warta, [97,98]<br>Wierzyca, [80]<br>Vistula, [80,97]<br>Łeba, [80]<br>Dębogórze Canal, [80]<br>Kozi Bród, [80]<br>Odra, [97]<br>Brda, [97]<br>Wkra, [97]<br>Dunajec, [97]<br>Lanskie Lake, [97]<br>Maroz Lake, [97]<br>Rybnik reservoir, [97] |          |                    |                            |                                                              |                |                     |  |
|                         | Ampicillin   |                                                               |                                                                                                           |                                           |                                                                                              |                                |                                    | <LOQ<br><LOQ<br><LOQ<br><LOQ<br><LOQ<br><LOQ<br><LOQ<br><LOQ<br><LOQ<br><LOQ<br><LOQ                                                   | Vistula, [97]<br>Warta, [97]<br>Odra, [97]<br>Brda, [97]<br>Wkra, [97]<br>Dunajec, [97]<br>Lanskie Lake, [97]<br>Maroz Lake, [97]<br>Rybnik reservoir, [97]                                                                                   |          |                    |                            |                                                              |                |                     |  |
|                         | Azithromycin | 87<br>360                                                     | Tychy, [97]<br>Olsztyn, [97]                                                                              | 230<br>650                                | Tychy, [97]<br>Olsztyn, [97]                                                                 |                                |                                    | <LOQ<br>25–441<br>5.2–36<br><LOQ–1520                                                                                                  | Warta, [81]<br>Gostynia, [72]<br>Łyna, [72]<br>Vistula, [74]                                                                                                                                                                                  |          |                    | <LOQ                       | Krajkowo, [81]                                               | <LOQ–193       | Warsaw, [74]        |  |

| PPCP group             | Compound     | Raw wastewater |                    | Treated wastewater |                    | Landfill leachate |                    | Surface water                                                        |                                                                                                                                                             | Seawater |                    | Groundwater |                    | Drinking water |                    |
|------------------------|--------------|----------------|--------------------|--------------------|--------------------|-------------------|--------------------|----------------------------------------------------------------------|-------------------------------------------------------------------------------------------------------------------------------------------------------------|----------|--------------------|-------------|--------------------|----------------|--------------------|
|                        |              | ng/L           | Location, [source] | ng/L               | Location, [source] | ng/L              | Location, [source] | ng/L                                                                 | Location, [source]                                                                                                                                          | ng/L     | Location, [source] | ng/L        | Location, [source] | ng/L           | Location, [source] |
| Antibiotics<br>(cont.) | Carbadox     |                |                    |                    |                    |                   |                    | 10.80–28.31<br><LOQ–14.87<br><LOQ–97.12<br><LOQ–98.19<br><LOQ–64.37  | Wierzycza, [80]<br>Vistula, [80]<br>Łeba, [80]<br>Dębogórze Canal, [80]<br>Kozi Bród, [80]                                                                  |          |                    |             |                    |                |                    |
|                        | Cefadroxil   |                |                    |                    |                    |                   |                    | <LOD–34                                                              | Vistula, [74]                                                                                                                                               |          |                    |             |                    | <LOD           | Warsaw, [74]       |
|                        | Cefalonium   |                |                    |                    |                    |                   |                    | <LOQ<br><LOQ<br><LOQ<br><LOQ<br><LOQ<br><LOQ<br><LOQ<br><LOQ<br><LOQ | Vistula, [97]<br>Warta, [97]<br>Odra, [97]<br>Brda, [97]<br>Wkra, [97]<br>Dunajec, [97]<br>Lanskie Lake, [97]<br>Maroz Lake, [97]<br>Rybnik reservoir, [97] |          |                    |             |                    |                |                    |
|                        | Cefapirin    |                |                    |                    |                    |                   |                    | <LOQ<br><LOQ<br><LOQ<br><LOQ<br><LOQ<br><LOQ<br><LOQ<br><LOQ<br><LOQ | Vistula, [97]<br>Warta, [97]<br>Odra, [97]<br>Brda, [97]<br>Wkra, [97]<br>Dunajec, [97]<br>Lanskie Lake, [97]<br>Maroz Lake, [97]<br>Rybnik reservoir, [97] |          |                    |             |                    |                |                    |
|                        | Cefazolin    |                |                    |                    |                    |                   |                    | <LOQ<br><LOQ<br><LOQ<br><LOQ<br><LOQ<br><LOQ<br><LOQ<br><LOQ<br><LOQ | Vistula, [97]<br>Warta, [97]<br>Odra, [97]<br>Brda, [97]<br>Wkra, [97]<br>Dunajec, [97]<br>Lanskie Lake, [97]<br>Maroz Lake, [97]<br>Rybnik reservoir, [97] |          |                    |             |                    |                |                    |
|                        | Cefoperazone |                |                    |                    |                    |                   |                    | <LOQ<br><LOQ<br><LOQ<br><LOQ<br><LOQ<br><LOQ<br><LOQ<br><LOQ<br><LOQ | Vistula, [97]<br>Warta, [97]<br>Odra, [97]<br>Brda, [97]<br>Wkra, [97]<br>Dunajec, [97]<br>Lanskie Lake, [97]<br>Maroz Lake, [97]<br>Rybnik reservoir, [97] |          |                    |             |                    |                |                    |
|                        | Cefotaxime   |                |                    |                    |                    |                   |                    | <LOD–71                                                              | Vistula, [74]                                                                                                                                               |          |                    |             |                    | <LOD           | Warsaw, [74]       |
|                        | Cefquinome   |                |                    |                    |                    |                   |                    | <LOQ<br><LOQ<br><LOQ<br><LOQ<br><LOQ<br><LOQ<br><LOQ<br><LOQ<br><LOQ | Vistula, [97]<br>Warta, [97]<br>Odra, [97]<br>Brda, [97]<br>Wkra, [97]<br>Dunajec, [97]<br>Lanskie Lake, [97]<br>Maroz Lake, [97]<br>Rybnik reservoir, [97] |          |                    |             |                    |                |                    |
|                        | Ceftazidime  |                |                    |                    |                    |                   |                    | <LOD–1150                                                            | Vistula, [74]                                                                                                                                               |          |                    |             |                    | <LOD           | Warsaw, [74]       |
|                        | Ceftiofur    |                |                    |                    |                    |                   |                    | <LOQ<br><LOQ<br><LOQ<br><LOQ<br><LOQ<br><LOQ<br><LOQ<br><LOQ<br><LOQ | Vistula, [97]<br>Warta, [97]<br>Odra, [97]<br>Brda, [97]<br>Wkra, [97]<br>Dunajec, [97]<br>Lanskie Lake, [97]<br>Maroz Lake, [97]<br>Rybnik reservoir, [97] |          |                    |             |                    |                |                    |

| PPCP group             | Compound          | Raw wastewater         |                                              | Treated wastewater    |                                              | Landfill leachate |                    | Surface water                                                                                |                                                                                                                                                                                                              | Seawater |                    | Groundwater      |                                | Drinking water |                    |
|------------------------|-------------------|------------------------|----------------------------------------------|-----------------------|----------------------------------------------|-------------------|--------------------|----------------------------------------------------------------------------------------------|--------------------------------------------------------------------------------------------------------------------------------------------------------------------------------------------------------------|----------|--------------------|------------------|--------------------------------|----------------|--------------------|
|                        |                   | ng/L                   | Location, [source]                           | ng/L                  | Location, [source]                           | ng/L              | Location, [source] | ng/L                                                                                         | Location, [source]                                                                                                                                                                                           | ng/L     | Location, [source] | ng/L             | Location, [source]             | ng/L           | Location, [source] |
| Antibiotics<br>(cont.) | Cephalexin        |                        |                                              |                       |                                              |                   |                    | <LOQ<br><LOQ<br><LOQ<br><LOQ<br><LOQ<br><LOQ<br><LOQ<br><LOQ                                 | Vistula, [97]<br>Warta, [97]<br>Odra, [97]<br>Brda, [97]<br>Wkra, [97]<br>Dunajec, [97]<br>Lanskie Lake, [97]<br>Maroz Lake, [97]<br>Rybnik reservoir, [97]                                                  |          |                    |                  |                                |                |                    |
|                        | Chloramphenicol   | 9.2–38.1               | Gdańsk, [73]                                 | 3.2–16.2              | Gdańsk, [73]                                 |                   |                    | <LOQ<br><LOQ–14.86<br><LOQ–24.36<br><LOQ–17.60<br><LOQ–24.15<br><LOQ                         | Warta, [81,98]<br>Wierzyca, [80]<br>Vistula, [80]<br>Łeba, [80]<br>Dębogórze Canal, [80]<br>Kozi Bród, [80]                                                                                                  |          |                    | <LOQ<br>0.9–12.8 | Krajkowo, [81]<br>Gdańsk, [80] | 0.9–0.9        | Gdańsk, [73]       |
|                        | Chlortetracycline |                        |                                              |                       |                                              |                   |                    | <LOQ<br><LOQ<br><LOQ<br><LOQ<br><LOQ<br><LOQ<br><LOQ<br><LOQ<br><LOQ                         | Vistula, [97]<br>Warta, [97]<br>Odra, [97]<br>Brda, [97]<br>Wkra, [97]<br>Dunajec, [97]<br>Lanskie Lake, [97]<br>Maroz Lake, [97]<br>Rybnik reservoir, [97]                                                  |          |                    |                  |                                |                |                    |
|                        | Ciprofloxacin     | 1260<br>4300           | Tychy, [72]<br>Olsztyn, [72]                 | 184<br>312            | Tychy, [72]<br>Olsztyn, [72]                 |                   |                    | 95–108<br>12–182<br><LOD–277<br><LOQ<br><LOQ<br><LOQ<br><LOQ<br><LOQ<br><LOQ<br><LOQ<br><LOQ | Gostynia, [72]<br>Łyna, [72]<br>Vistula, [74,97]<br>Warta, [97]<br>Odra, [97]<br>Brda, [97]<br>Wkra, [97]<br>Dunajec, [97]<br>Lanskie Lake, [97]<br>Maroz Lake, [97]<br>Rybnik reservoir, [97]               |          |                    |                  |                                | <LOD           | Warsaw, [74]       |
|                        | Clarithromycin    | 904–1416<br>480<br>560 | Gdańsk, [88]<br>Tychy, [72]<br>Olsztyn, [72] | 185–761<br>160<br>143 | Gdańsk, [88]<br>Tychy, [72]<br>Olsztyn, [72] |                   |                    | <LOQ<br>37–79<br>12.2–20.5<br><LOD–1430                                                      | Warta, [81]<br>Gostynia, [72]<br>Łyna, [72]<br>Vistula, [74]                                                                                                                                                 |          |                    | <LOQ             | Krajkowo, [81]                 | <LOD–52        | Warsaw, [74]       |
|                        | Clindamycin       | 134<br>106             | Tychy, [72]<br>Olsztyn, [72]                 | 166<br>290            | Tychy, [72]<br>Olsztyn, [72]                 |                   |                    | <LOQ–12.7<br>78–34<br>2.3–25.4<br><LOD–369                                                   | Warta, [81]<br>Gostynia, [72]<br>Łyna, [72]<br>Vistula, [74]                                                                                                                                                 |          |                    | <LOQ             | Krajkowo, [81]                 | <LOD–8.1       | Warsaw, [74]       |
|                        | Cloxacillin       |                        |                                              |                       |                                              |                   |                    | <LOD<br><LOD<br><LOD                                                                         | Drwęca, [100]<br>Wkra, [100]<br>Mławka, [100]                                                                                                                                                                |          |                    |                  |                                |                |                    |
|                        | Danofloxacin      |                        |                                              |                       |                                              |                   |                    | <LOQ<br><LOQ<br><LOQ<br><LOQ<br><LOQ<br><LOQ<br><LOQ<br><LOQ<br><LOQ                         | Vistula, [97]<br>Warta, [97]<br>Odra, [97]<br>Brda, [97]<br>Wkra, [97]<br>Dunajec, [97]<br>Lanskie Lake, [97]<br>Maroz Lake, [97]<br>Rybnik reservoir, [97]                                                  |          |                    |                  |                                |                |                    |
|                        | Dicloxacillin     |                        |                                              |                       |                                              |                   |                    | <LOD<br><LOD<br><LOD<br><LOQ<br><LOQ<br><LOQ<br><LOQ<br><LOQ<br><LOQ<br><LOQ<br><LOQ<br><LOQ | Drwęca, [100]<br>Wkra, [100]<br>Mławka, [100]<br>Vistula, [97]<br>Warta, [97]<br>Odra, [97]<br>Brda, [97]<br>Wkra, [97]<br>Dunajec, [97]<br>Lanskie Lake, [97]<br>Maroz Lake, [97]<br>Rybnik reservoir, [97] |          |                    |                  |                                |                |                    |

| PPCP group             | Compound            | Raw wastewater                     |                                                                                      | Treated wastewater    |                                                 | Landfill leachate |                    | Surface water                                                                                                                          |                                                                                                                                                                                                                                            | Seawater           |                                                    | Groundwater  |                                | Drinking water   |                              |
|------------------------|---------------------|------------------------------------|--------------------------------------------------------------------------------------|-----------------------|-------------------------------------------------|-------------------|--------------------|----------------------------------------------------------------------------------------------------------------------------------------|--------------------------------------------------------------------------------------------------------------------------------------------------------------------------------------------------------------------------------------------|--------------------|----------------------------------------------------|--------------|--------------------------------|------------------|------------------------------|
|                        |                     | ng/L                               | Location, [source]                                                                   | ng/L                  | Location, [source]                              | ng/L              | Location, [source] | ng/L                                                                                                                                   | Location, [source]                                                                                                                                                                                                                         | ng/L               | Location, [source]                                 | ng/L         | Location, [source]             | ng/L             | Location, [source]           |
| Antibiotics<br>(cont.) | Difloxacin          |                                    |                                                                                      |                       |                                                 |                   |                    | <LOQ<br><LOQ<br><LOQ<br><LOQ<br><LOQ<br><LOQ<br><LOQ<br><LOQ<br><LOQ                                                                   | Vistula, [97]<br>Warta, [97]<br>Odra, [97]<br>Brda, [97]<br>Wkra, [97]<br>Dunajec, [97]<br>Lanskie Lake, [97]<br>Maroz Lake, [97]<br>Rybnik reservoir, [97]                                                                                |                    |                                                    |              |                                |                  |                              |
|                        | Dihydrostreptomycin |                                    |                                                                                      |                       |                                                 |                   |                    | <LOQ<br><LOQ<br><LOQ<br><LOQ<br><LOQ<br><LOQ<br><LOQ<br><LOQ<br><LOQ                                                                   | Vistula, [97]<br>Warta, [97]<br>Odra, [97]<br>Brda, [97]<br>Wkra, [97]<br>Dunajec, [97]<br>Lanskie Lake, [97]<br>Maroz Lake, [97]<br>Rybnik reservoir, [44]                                                                                |                    |                                                    |              |                                |                  |                              |
|                        | Doxycycline         |                                    |                                                                                      |                       |                                                 |                   |                    | <LOQ<br><LOQ<br><LOQ<br><LOQ<br><LOQ<br><LOQ<br><LOQ<br><LOQ<br><LOQ                                                                   | Vistula, [97]<br>Warta, [97]<br>Odra, [97]<br>Brda, [97]<br>Wkra, [97]<br>Dunajec, [97]<br>Lanskie Lake, [97]<br>Maroz Lake, [97]<br>Rybnik reservoir, [97]                                                                                |                    |                                                    |              |                                |                  |                              |
|                        | Enoxacin            |                                    |                                                                                      |                       |                                                 |                   |                    | <LOD<br><LOD<br><LOD                                                                                                                   | Drwęca, [100]<br>Wkra, [100]<br>Mławka, [100]                                                                                                                                                                                              |                    |                                                    |              |                                |                  |                              |
|                        | Enrofloxacin        |                                    |                                                                                      |                       |                                                 |                   |                    | <LOQ–21.62<br><LOQ–18.69<br><LOQ<br><LOQ–15.32<br><LOQ<br><LOQ<br><LOQ<br><LOQ<br><LOQ<br><LOQ<br><LOQ<br><LOQ<br><LOQ<br><LOQ<br><LOQ | Wierzyca, [80]<br>Vistula, [80,97]<br>Łeba, [80]<br>Dębogórze Canal, [80]<br>Kozi Bród, [80]<br>Warta, [97]<br>Odra, [97]<br>Brda, [97]<br>Wkra, [97]<br>Dunajec, [97]<br>Lanskie Lake, [97]<br>Maroz Lake, [97]<br>Rybnik reservoir, [97] | 207.7<br><LOD–<LOQ | Southern Baltic Sea,[108]<br>Gulf of Gdańsk, [107] | <LOD–7       | not given, [28,109,110]        |                  |                              |
|                        | Erythromycin        | <LOD–141.8<br>51<br>26<br>58<br>28 | Gdańsk, [17,73,88]<br>Lublin, [17]<br>Szczecin, [17]<br>Tychy, [72]<br>Olsztyn, [72] | 11.9–98.1<br>21<br>16 | Gdańsk, [73,88]<br>Tychy, [72]<br>Olsztyn, [72] |                   |                    | <LOQ<br>7–10<br><LOD<br><LOD–1020<br><LOQ<br><LOQ<br><LOQ<br><LOQ<br><LOQ<br><LOQ<br><LOQ<br><LOQ<br><LOQ<br><LOQ                      | Warta, [81,97]<br>Gostynia, [72]<br>Łyna, [72]<br>Vistula, [74,97]<br>Odra, [97]<br>Brda, [97]<br>Wkra, [97]<br>Dunajec, [97]<br>Lanskie Lake, [97]<br>Maroz lae, [97]<br>Rybnik reservoir, [97]                                           |                    |                                                    | <LOQ<br>1–14 | Krajkowo, [81]<br>Gdańsk, [73] | 2.1–6<br><LOD–57 | Gdańsk, [73]<br>Warsaw, [74] |
|                        | Fleroxacin          |                                    |                                                                                      |                       |                                                 |                   |                    | <LOD–3.5                                                                                                                               | Vistula, [74]                                                                                                                                                                                                                              |                    |                                                    |              |                                | <LOD–0.38        | Warsaw, [74]                 |
|                        | Flumequine          |                                    |                                                                                      |                       |                                                 |                   |                    | <LOQ<br><LOQ<br><LOQ<br><LOQ<br><LOQ<br><LOQ<br><LOQ<br><LOQ<br><LOQ                                                                   | Vistula, [97]<br>Warta, [97]<br>Odra, [97]<br>Brda, [97]<br>Wkra, [97]<br>Dunajec, [97]<br>Lanskie Lake, [97]<br>Maroz Lake, [97]<br>Rybnik reservoir, [97]                                                                                |                    |                                                    |              |                                |                  |                              |
|                        | Fluraltadone        |                                    |                                                                                      |                       |                                                 |                   |                    | <LOD<br><LOD<br><LOD                                                                                                                   | Drwęca, [100]<br>Wkra, [100]<br>Mławka, [100]                                                                                                                                                                                              |                    |                                                    |              |                                |                  |                              |

| PPCP group             | Compound       | Raw wastewater |                              | Treated wastewater |                              | Landfill leachate |                    | Surface water                                                                                    |                                                                                                                                                                                                | Seawater |                    | Groundwater |                    | Drinking water |                    |
|------------------------|----------------|----------------|------------------------------|--------------------|------------------------------|-------------------|--------------------|--------------------------------------------------------------------------------------------------|------------------------------------------------------------------------------------------------------------------------------------------------------------------------------------------------|----------|--------------------|-------------|--------------------|----------------|--------------------|
|                        |                | ng/L           | Location, [source]           | ng/L               | Location, [source]           | ng/L              | Location, [source] | ng/L                                                                                             | Location, [source]                                                                                                                                                                             | ng/L     | Location, [source] | ng/L        | Location, [source] | ng/L           | Location, [source] |
| Antibiotics<br>(cont.) | Josamycin      |                |                              |                    |                              |                   |                    | <LOQ<br><LOQ<br><LOQ<br><LOQ<br><LOQ<br><LOQ<br><LOQ<br><LOQ                                     | Vistula, [97]<br>Warta, [97]<br>Odra, [97]<br>Brda, [97]<br>Wkra, [97]<br>Dunajec, [97]<br>Lanskie Lake, [97]<br>Maroz Lake, [97]<br>Rybnik reservoir, [97]                                    |          |                    |             |                    |                |                    |
|                        | Levofloxacin   |                |                              |                    |                              |                   |                    | <LOD–80                                                                                          | Vistula, [74]                                                                                                                                                                                  |          |                    |             |                    | <LOD–6.9       | Warsaw, [74]       |
|                        | Lincomycin     | 20<br>102      | Tychy, [72]<br>Olsztyn, [72] | 48<br>56           | Tychy, [72]<br>Olsztyn, [72] |                   |                    | 3–9<br><LOD–4<br><LOQ–61<br><LOQ<br><LOQ<br><LOQ<br><LOQ<br><LOQ<br><LOQ<br><LOQ<br><LOQ<br><LOQ | Gostynia, [72]<br>Łyna, [72]<br>Vistula, [97,74]<br>Warta, [97]<br>Odra, [97]<br>Brda, [97]<br>Wkra, [97]<br>Dunajec, [97]<br>Lanskie Lake, [97]<br>Maroz Lake, [97]<br>Rybnik reservoir, [97] |          |                    |             |                    | <LOD–0.67      | Warsaw, [74]       |
|                        | Lomefloxacin   |                |                              |                    |                              |                   |                    | <LOD–1.4                                                                                         | Vistula, [74]                                                                                                                                                                                  |          |                    |             |                    | <LOD–0.39      | Warsaw, [74]       |
|                        | Marbofloxacin  |                |                              |                    |                              |                   |                    | <LOQ<br><LOQ<br><LOQ<br><LOQ<br><LOQ<br><LOQ<br><LOQ<br><LOQ<br><LOQ                             | Vistula, [97]<br>Warta, [97]<br>Odra, [97]<br>Brda, [97]<br>Wkra, [97]<br>Dunajec, [97]<br>Lanskie Lake, [97]<br>Maroz Lake, [97]<br>Rybnik reservoir, [97]                                    |          |                    |             |                    |                |                    |
|                        | Metronidazole  | 250<br>7400    | Tychy, [72]<br>Olsztyn, [72] | 69<br>88           | Tychy, [72]<br>Olsztyn, [72] |                   |                    | <LOD<br><LOD<br><LOD<br><LOQ<br>9–21<br><LOD–9.4<br><LOD–350                                     | Drwęca, [100]<br>Wkra, [100]<br>Mławka, [100]<br>Warta, [98]<br>Gostynia, [72]<br>Łyna, [72]<br>Vistula, [74]                                                                                  |          |                    |             |                    | <LOD–3.4       | Warsaw, [74]       |
|                        | Nafcillin      |                |                              |                    |                              |                   |                    | <LOQ<br><LOQ<br><LOQ<br><LOQ<br><LOQ<br><LOQ<br><LOQ<br><LOQ<br><LOQ                             | Vistula, [97]<br>Warta, [97]<br>Odra, [97]<br>Brda, [97]<br>Wkra, [97]<br>Dunajec, [97]<br>Lanskie Lake, [97]<br>Maroz Lake, [97]<br>Rybnik reservoir, [97]                                    |          |                    |             |                    |                |                    |
|                        | Nalidixic acid |                |                              |                    |                              |                   |                    | <LOD–1.7<br><LOQ<br><LOQ<br><LOQ<br><LOQ<br><LOQ<br><LOQ<br><LOQ<br><LOQ                         | Vistula, [74,97]<br>Warta, [97]<br>Odra, [97]<br>Brda, [97]<br>Wkra, [97]<br>Dunajec, [97]<br>Lanskie Lake, [97]<br>Maroz Lake, [97]<br>Rybnik reservoir, [97]                                 |          |                    |             |                    | <LOD           | Warsaw, [74]       |
|                        | Neomycin       |                |                              |                    |                              |                   |                    | <LOQ<br><LOQ<br><LOQ<br><LOQ<br><LOQ<br><LOQ<br><LOQ<br><LOQ<br><LOQ                             | Vistula, [97]<br>Warta, [97]<br>Odra, [97]<br>Brda, [97]<br>Wkra, [97]<br>Dunajec, [97]<br>Lanskie Lake, [97]<br>Maroz Lake, [97]<br>Rybnik reservoir, [97]                                    |          |                    |             |                    |                |                    |
|                        | Nitrofurantoin |                |                              |                    |                              |                   |                    | <LOD<br><LOD<br><LOD                                                                             | Drwęca, [100]<br>Wkra, [100]<br>Mławka, [100]                                                                                                                                                  |          |                    |             |                    |                |                    |

| PPCP group             | Compound        | Raw wastewater           |                                              | Treated wastewater    |                                              | Landfill leachate |                    | Surface water                                                                                                                                         |                                                                                                                                                                                                                                                                             | Seawater |                           | Groundwater |                    | Drinking water   |                              |
|------------------------|-----------------|--------------------------|----------------------------------------------|-----------------------|----------------------------------------------|-------------------|--------------------|-------------------------------------------------------------------------------------------------------------------------------------------------------|-----------------------------------------------------------------------------------------------------------------------------------------------------------------------------------------------------------------------------------------------------------------------------|----------|---------------------------|-------------|--------------------|------------------|------------------------------|
|                        |                 | ng/L                     | Location, [source]                           | ng/L                  | Location, [source]                           | ng/L              | Location, [source] | ng/L                                                                                                                                                  | Location, [source]                                                                                                                                                                                                                                                          | ng/L     | Location, [source]        | ng/L        | Location, [source] | ng/L             | Location, [source]           |
| Antibiotics<br>(cont.) | Norfloxacin     | 240<br>80                | Tychy, [72]<br>Olsztyn, [72]                 | 31<br>10              | Tychy, [72]<br>Olsztyn, [72]                 |                   |                    | <LOD–95<br><LOD<br><LOD–164<br><LOQ<br><LOQ<br><LOQ<br><LOQ<br><LOQ<br><LOQ<br><LOQ<br><LOQ<br><LOQ<br><LOQ                                           | Gostynia, [72]<br>Łyna, [72]<br>Vistula, [74,97]<br>Warta, [97]<br>Odra, [97]<br>Brda, [97]<br>Wkra, [97]<br>Dunajec, [97]<br>Lanskie Lake, [97]<br>Maroz Lake, [97]<br>Rybnik reservoir, [97]                                                                              |          |                           |             |                    | <LOD             | Warsaw, [74]                 |
|                        | Ofloxacin       | 39.4–363.9<br>135<br>195 | Gdańsk, [73]<br>Tychy, [72]<br>Olsztyn, [72] | 9.5–203.4<br>26<br>40 | Gdańsk, [73]<br>Tychy, [72]<br>Olsztyn, [72] |                   |                    | 4–32<br>8.4–31<br><LOD–89                                                                                                                             | Gostynia, [72]<br>Łyna, [72]<br>Vistula, [74]                                                                                                                                                                                                                               |          |                           | <LOD        | Gdańsk, [73]       | <LOD<br><LOD–7.9 | Gdańsk, [73]<br>Warsaw, [74] |
|                        | Oleandomycin    |                          |                                              |                       |                                              |                   |                    | <LOD<br><LOD<br><LOD                                                                                                                                  | Drwęca, [100]<br>Wkra, [100]<br>Mławka, [100]                                                                                                                                                                                                                               |          |                           |             |                    |                  |                              |
|                        | Oxacillin       |                          |                                              |                       |                                              |                   |                    | <LOQ<br><LOQ<br><LOQ<br><LOQ<br><LOQ<br><LOQ<br><LOQ<br><LOQ<br><LOQ                                                                                  | Vistula, [97]<br>Warta, [97]<br>Odra, [97]<br>Brda, [97]<br>Wkra, [97]<br>Dunajec, [97]<br>Lanskie Lake, [97]<br>Maroz Lake, [97]<br>Rybnik reservoir, [97]                                                                                                                 |          |                           |             |                    |                  |                              |
|                        | Oxolinic acid   |                          |                                              |                       |                                              |                   |                    | <LOQ<br><LOQ<br><LOQ<br><LOQ<br><LOQ<br><LOQ<br><LOQ<br><LOQ<br><LOQ                                                                                  | Vistula, [97]<br>Warta, [97]<br>Odra, [97]<br>Brda, [97]<br>Wkra, [97]<br>Dunajec, [97]<br>Lanskie Lake, [97]<br>Maroz Lake, [97]<br>Rybnik reservoir, [97]                                                                                                                 | 1026     | Southern Baltic Sea,[108] |             |                    |                  |                              |
|                        | Oxytetracycline | 0.7<br><LOD              | Tychy, [72]<br>Olsztyn, [72]                 | 0.1<br><LOD           | Tychy, [72]<br>Olsztyn, [72]                 |                   |                    | <LOQ–14.34<br><LOQ–19.91<br><LOQ–15.34<br><LOQ–9.43<br><LOQ<br><LOD–1<br><LOD<br><LOQ<br><LOQ<br><LOQ<br><LOQ<br><LOQ<br><LOQ<br><LOQ<br><LOQ<br><LOQ | Wierzycza, [80]<br>Vistula, [80,97]<br>Łeba, [80]<br>Dębogórze Canal, [80]<br>Kozi Bród, [80]<br>Gostynia, [72]<br>Łyna, [72]<br>Warta, [97]<br>Odra, [97]<br>Brda, [97]<br>Wkra, [97]<br>Dunajec, [97]<br>Lanskie Lake, [97]<br>Maroz Lake, [97]<br>Rybnik reservoir, [97] |          |                           |             |                    |                  |                              |
|                        | Penicillin G    |                          |                                              |                       |                                              |                   |                    | <LOQ–17.1<br><LOD<br><LOD–<LOQ<br><LOD<br><LOQ<br><LOQ<br><LOQ<br><LOQ<br><LOQ<br><LOQ<br><LOQ<br><LOQ<br><LOQ                                        | Warta, [81,97]<br>Drwęca, [100]<br>Wkra, [97,100]<br>Mławka, [100]<br>Vistula, [97]<br>Odra, [97]<br>Brda, [97]<br>Dunajec, [97]<br>Lanskie Lake, [97]<br>Maroz Lake, [8]<br>Rybnik reservoir, [89]                                                                         |          |                           | <LOQ        | Krajkowo, [81]     |                  |                              |
|                        | Rifampicin      | 5.2<br>5.3               | Tychy, [72]<br>Olsztyn, [72]                 | <LOD<br>2.9           | Tychy, [72]<br>Olsztyn, [72]                 |                   |                    | <LOD<br><LOD<br><LOD–3.3                                                                                                                              | Gostynia, [78]<br>Łyna, [78]<br>Vistula, [90]                                                                                                                                                                                                                               |          |                           |             |                    | <LOD             | Warsaw, [74]                 |
|                        | Roxithromycin   | 105–161<br>18<br>6.2     | Gdańsk, [88]<br>Tychy, [72]<br>Olsztyn, [72] | 55–132<br>6.6<br>6.2  | Gdańsk, [88]<br>Tychy, [72]<br>Olsztyn, [72] |                   |                    | <LOQ<br>4–5<br><LOD<br><LOD–33                                                                                                                        | Warta, [95]<br>Gostynia, [78]<br>Łyna, [78]<br>Vistula, [90]                                                                                                                                                                                                                |          |                           | <LOQ        | Krajkowo, [81]     | <LOD–0.59        | Warsaw, [74]                 |



| PPCP group             | Compound               | Raw wastewater                        |                                                              | Treated wastewater    |                                              | Landfill leachate |                    | Surface water                                                                                                                                 |                                                                                                                                                                                                                                                                                                              | Seawater                       |                                                                          | Groundwater                        |                                                                            | Drinking water |                    |
|------------------------|------------------------|---------------------------------------|--------------------------------------------------------------|-----------------------|----------------------------------------------|-------------------|--------------------|-----------------------------------------------------------------------------------------------------------------------------------------------|--------------------------------------------------------------------------------------------------------------------------------------------------------------------------------------------------------------------------------------------------------------------------------------------------------------|--------------------------------|--------------------------------------------------------------------------|------------------------------------|----------------------------------------------------------------------------|----------------|--------------------|
|                        |                        | ng/L                                  | Location, [source]                                           | ng/L                  | Location, [source]                           | ng/L              | Location, [source] | ng/L                                                                                                                                          | Location, [source]                                                                                                                                                                                                                                                                                           | ng/L                           | Location, [source]                                                       | ng/L                               | Location, [source]                                                         | ng/L           | Location, [source] |
| Antibiotics<br>(cont.) | Sulfamethazine         | <LOD                                  | Zabrze, [76]                                                 |                       |                                              |                   |                    | <LOQ<br><LOD–14<br><LOQ<br><LOQ<br><LOQ<br><LOQ<br><LOQ<br><LOQ<br><LOQ<br><LOQ                                                               | Warta, [81,97]<br>Vistula, [74,97]<br>Odra, [97]<br>Brda, [97]<br>Wkra, [97]<br>Dunajec, [97]<br>Lanskie Lake, [97]<br>Maroz Lake, [97]<br>Rybnik reservoir, [97]                                                                                                                                            | 114<br><LOD–<LOQ               | Southern Baltic Sea,[108]<br>Gulf of Gdańsk, [107]                       | <LOD–>LOD<br><LOQ                  | not given, [28,109,110]<br>Krajkowo, [81]                                  | <LOD–<LOQ      | Warsaw, [74]       |
|                        | Sulfamethizole         |                                       |                                                              |                       |                                              |                   |                    | <LOD<br><LOD<br><LOD                                                                                                                          | Drwęca, [100]<br>Wkra, [100]<br>Mławka, [100]                                                                                                                                                                                                                                                                | 65.79<br><LOD                  | Southern Baltic Sea,[108]<br>Gulf of Gdańsk, [107]                       |                                    |                                                                            |                |                    |
|                        | Sulfamethoxazole       | >LOD–2000<br>1225–146<br>1300<br>3000 | Zabrze, [76]<br>Gdańsk, [88]<br>Tychy, [72]<br>Olsztyn, [72] | 508–642<br>630<br>770 | Gdańsk, [88]<br>Tychy, [72]<br>Olsztyn, [72] |                   |                    | <LOQ–306<br><LOD<br><LOD–<LOQ<br><LOD<br>451–644<br><LOD–76.1<br><LOD–1770<br><LOQ<br><LOQ<br><LOQ<br><LOQ<br><LOQ<br><LOQ<br>6<br>6.2<br>5.9 | Warta, [63,81,97,98,99]<br>Drwęca, [100]<br>Wkra, [97,100]<br>Mławka, [100]<br>Gostynia, [72]<br>Łyna, [72]<br>Vistula, [74,97]<br>Odra, [97]<br>Brda, [97]<br>Dunajec, [97]<br>Lanskie Lake, [97]<br>Maroz Lake, [97]<br>Rybnik reservoir, [97]<br>Reda, [101]<br>Zagórska Struga, [101]<br>Płutnica, [101] | 311<br><LOD–10.8<br><LOD       | Southern Baltic Sea,[108]<br>Gulf of Gdańsk, [107]<br>Bay of Puck, [101] | <LOD–66<br><LOQ–27.1<br><LOD–16.1  | not given, [28,109,110]<br>Krajkowo, [63,81,99]<br>Bay of Puck area, [101] | <LOD–5.9       | Warsaw, [74]       |
|                        | Sulfamethoxypyridazine |                                       |                                                              |                       |                                              |                   |                    | <LOD<br><LOD<br><LOD                                                                                                                          | Drwęca, [100]<br>Wkra, [100]<br>Mławka, [100]                                                                                                                                                                                                                                                                |                                |                                                                          |                                    |                                                                            |                |                    |
|                        | Sulfamonomethaxine     |                                       |                                                              |                       |                                              |                   |                    | <LOQ<br><LOQ<br><LOQ<br><LOQ<br><LOQ<br><LOQ<br><LOQ<br><LOQ<br><LOQ<br><LOQ<br><LOQ                                                          | Vistula, [97]<br>Warta, [97]<br>Odra, [97]<br>Brda, [97]<br>Wkra, [97]<br>Dunajec, [97]<br>Lanskie Lake, [97]<br>Maroz Lake, [97]<br>Rybnik reservoir, [97]                                                                                                                                                  |                                |                                                                          |                                    |                                                                            |                |                    |
|                        | Sulfanilamide          |                                       |                                                              |                       |                                              |                   |                    | <LOD–350                                                                                                                                      | Vistula, [74]                                                                                                                                                                                                                                                                                                |                                |                                                                          |                                    |                                                                            | <LOD–<LOQ      | Warsaw, [74]       |
|                        | Sulfapyridine          |                                       |                                                              |                       |                                              |                   |                    | <LOQ–39<br>21.7<br><LOD<br><LOD                                                                                                               | Warta, [81,98]<br>Reda, [101]<br>Zagórska Struga, [101]<br>Płutnica, [101]                                                                                                                                                                                                                                   | <LOD<br><LOD–<LOQ<br><LOD–28.2 | Southern Baltic Sea,[108]<br>Gulf of Gdańsk, [107]<br>Bay of Puck, [101] | <LOD–23<br><LOQ–14.2<br><LOD–177.1 | not given, [28,109,110]<br>Krajkowo, [81]<br>Bay of Puck area, [101]       |                |                    |
|                        | Sulfasalazine          | 111–2266.8                            | Kraków, [71]                                                 | 1.3–44.5              | Kraków, [71]                                 |                   |                    | 14.1–31.2                                                                                                                                     | Drwina, [71]                                                                                                                                                                                                                                                                                                 |                                |                                                                          |                                    |                                                                            |                |                    |
|                        | Sulfathiazole          | 94<br>180                             | Tychy, [72]<br>Olsztyn, [72]                                 | 21<br>36              | Tychy, [72]<br>Olsztyn, [72]                 |                   |                    | 7–29<br><LOD<br><LOQ–103<br><LOQ<br><LOQ<br><LOQ<br><LOQ<br><LOQ<br><LOQ<br><LOQ<br><LOQ<br><LOQ                                              | Gostynia, [72]<br>Łyna, [72]<br>Vistula, [74,97]<br>Warta, [97]<br>Odra, [97]<br>Brda, [97]<br>Wkra, [97]<br>Dunajec, [97]<br>Lanskie Lake, [97]<br>Maroz Lake, [97]<br>Rybnik reservoir, [97]                                                                                                               | 128.4<br><LOD–<LOQ             | Southern Baltic Sea,[108]<br>Gulf of Gdańsk, [107]                       | <LOD–<LOQ                          | not given, [28,109,110]                                                    | <LOD–0.52      | Warsaw, [74]       |
|                        | Sulfisoxazole          |                                       |                                                              |                       |                                              |                   |                    |                                                                                                                                               |                                                                                                                                                                                                                                                                                                              | 79.57<br><LOD                  | Southern Baltic Sea,[108]<br>Gulf of Gdańsk, [107]                       |                                    |                                                                            |                |                    |
|                        | Tetracycline           | 190<br>210                            | Tychy, [72]<br>Olsztyn, [72]                                 | 39<br>61              | Tychy, [72]<br>Olsztyn, [72]                 |                   |                    | <LOD<br><LOD–7.2<br><LOQ<br><LOQ<br><LOQ<br><LOQ<br><LOQ<br><LOQ<br><LOQ<br><LOQ<br><LOQ<br><LOQ<br><LOQ                                      | Gostynia, [72]<br>Łyna, [72]<br>Vistula, [97]<br>Warta, [97]<br>Odra, [97]<br>Brda, [97]<br>Wkra, [97]<br>Dunajec, [97]<br>Lanskie Lake, [97]<br>Maroz Lake, [97]<br>Rybnik reservoir, [97]                                                                                                                  |                                |                                                                          |                                    |                                                                            |                |                    |

| PPCP group             | Compound       | Raw wastewater                        |                                                                                   | Treated wastewater      |                                                   | Landfill leachate |                    | Surface water                                                                                            |                                                                                                                                                                                                      | Seawater        |                                                    | Groundwater  |                                           | Drinking water |                    |
|------------------------|----------------|---------------------------------------|-----------------------------------------------------------------------------------|-------------------------|---------------------------------------------------|-------------------|--------------------|----------------------------------------------------------------------------------------------------------|------------------------------------------------------------------------------------------------------------------------------------------------------------------------------------------------------|-----------------|----------------------------------------------------|--------------|-------------------------------------------|----------------|--------------------|
|                        |                | ng/L                                  | Location, [source]                                                                | ng/L                    | Location, [source]                                | ng/L              | Location, [source] | ng/L                                                                                                     | Location, [source]                                                                                                                                                                                   | ng/L            | Location, [source]                                 | ng/L         | Location, [source]                        | ng/L           | Location, [source] |
| Antibiotics<br>(cont.) | Tiamulin       |                                       |                                                                                   |                         |                                                   |                   |                    | <LOQ<br><LOQ<br><LOQ<br><LOQ<br><LOQ<br><LOQ<br><LOQ<br><LOQ                                             | Warta, [81,97]<br>Vistula, [97]<br>Odra, [97]<br>Brda, [97]<br>Wkra, [97]<br>Dunajec, [97]<br>Lanskie Lake, [97]<br>Maroz Lake, [97]<br>Rybnik reservoir, [97]                                       |                 |                                                    | <LOQ         | Krajkowo, [81]                            |                |                    |
|                        | Tilmicosin     |                                       |                                                                                   |                         |                                                   |                   |                    | <LOQ<br><LOQ<br><LOQ<br><LOQ<br><LOQ<br><LOQ<br><LOQ<br><LOQ                                             | Vistula, [97]<br>Warta, [97]<br>Odra, [97]<br>Brda, [97]<br>Wkra, [97]<br>Dunajec, [97]<br>Lanskie Lake, [97]<br>Maroz Lake, [97]<br>Rybnik reservoir, [97]                                          |                 |                                                    |              |                                           |                |                    |
|                        | Trimethoprim   | 441–482<br>254<br>900                 | Gdańsk, [88]<br>Tychy, [72]<br>Olszyn, [72]                                       | 269–445<br>160<br>220   | Gdańsk, [88]<br>Tychy, [72]<br>Olszyn, [72]       |                   |                    | <LOQ–27<br>36–38<br>9.1–24.4<br><LOQ–247<br><LOQ<br><LOQ<br><LOQ<br><LOQ<br><LOQ<br><LOQ<br><LOQ<br><LOQ | Warta, [81,97,98]<br>Gostynia, [72]<br>Łyna, [72]<br>Vistula, [74,97]<br>Odra, [97]<br>Brda, [97]<br>Wkra, [97]<br>Dunajec, [97]<br>Lanskie Lake, [97]<br>Maroz Lake, [97]<br>Rybnik reservoir, [97] | 279<br><LOD–3.4 | Southern Baltic Sea,[108]<br>Gulf of Gdańsk, [107] | <LOD<br><LOQ | not given, [28,109,110]<br>Krajkowo, [81] | <LOD–2.1       | Warsaw, [74]       |
|                        | Tylosin        |                                       |                                                                                   |                         |                                                   |                   |                    | <LOQ<br><LOQ<br><LOQ<br><LOQ<br><LOQ<br><LOQ<br><LOQ<br><LOQ<br><LOQ                                     | Vistula, [97]<br>Warta, [97]<br>Odra, [97]<br>Brda, [97]<br>Wkra, [97]<br>Dunajec, [97]<br>Lanskie Lake, [97]<br>Maroz Lake, [97]<br>Rybnik reservoir, [97]                                          |                 |                                                    |              |                                           |                |                    |
|                        | Vancomycin     | 350<br>3200                           | Tychy, [72]<br>Olsztyn, [72]                                                      | 114<br>162              | Tychy, [72]<br>Olsztyn, [72]                      |                   |                    | 27–62<br><LOD–10.7<br><LOD–117                                                                           | Gostynia, [72]<br>Łyna, [72]<br>Vistula, [74]                                                                                                                                                        |                 |                                                    |              |                                           | <LOD           | Warsaw, [74]       |
| Antidementia<br>agents | Memantine      |                                       |                                                                                   |                         |                                                   |                   |                    | <LOQ                                                                                                     | Warta, [81]                                                                                                                                                                                          |                 |                                                    | <LOQ         | Krajkowo, [81]                            |                |                    |
| Antidepressants        | Amitriptyline  |                                       |                                                                                   |                         |                                                   |                   |                    | <LOQ                                                                                                     | Warta, [98]                                                                                                                                                                                          |                 |                                                    | <LOD         | not given, [109]                          |                |                    |
|                        | Citalopram     |                                       |                                                                                   |                         |                                                   |                   |                    | <LOQ                                                                                                     | Warta, [81]                                                                                                                                                                                          |                 |                                                    | <LOQ         | Krajkowo, [81]                            |                |                    |
|                        | Clomipramine   |                                       |                                                                                   |                         |                                                   |                   |                    |                                                                                                          |                                                                                                                                                                                                      |                 |                                                    | <LOD         | not given, [28,109,110]                   |                |                    |
|                        | Desvenlafaxine |                                       |                                                                                   |                         |                                                   |                   |                    | 131–590.5<br>13–71.5                                                                                     | Drwina, [71]<br>Vistula, [71]                                                                                                                                                                        |                 |                                                    |              |                                           |                |                    |
|                        | Diazepam       | <LOD–214<br>96<br>531<br><LOQ<br><LOD | Gdańsk, [17,95]<br>Lublin, [17]<br>Szczecin, [17]<br>Kraków, [71]<br>Zabrze, [76] | <LOD–114<br>163<br><LOQ | Gdańsk, [17,95]<br>Szczecin, [17]<br>Kraków, [71] |                   |                    | <LOD<br><LOD<br><LOQ–31.14<br><LOQ–16.23<br>27.61–52.64<br><LOQ–64.15<br>36.74–46.13                     | Radunia, [95]<br>Kacza, [95]<br>Wierzyca, [80]<br>Vistula, [80]<br>Łeba, [80]<br>Dębogórze Canal, [80]<br>Kozi Bród, [80]                                                                            |                 |                                                    | <LOD         | Gdańsk, [95]                              | <LOD           | Gdańsk, [95]       |
|                        | Doxepin        |                                       |                                                                                   |                         |                                                   |                   |                    |                                                                                                          |                                                                                                                                                                                                      |                 |                                                    | <LOD–<LOQ    | not given, [28,109,110]                   |                |                    |
|                        | Fluoxetine     |                                       |                                                                                   |                         |                                                   |                   |                    | <LOQ<br><LOQ–67.50<br><LOQ–38.94<br><LOQ–87.16<br><LOQ–21.83<br><LOQ–67.16                               | Warta, [81]<br>Wierzyca, [80]<br>Vistula, [80]<br>Łeba, [80]<br>Dębogórze Canal, [80]<br>Kozi Bród, [80]                                                                                             |                 |                                                    | <LOQ         | Krajkowo, [81]                            |                |                    |
|                        | Fluvoxamine    | <LOD                                  | Gdańsk, [73]                                                                      | <LOD                    | Gdańsk, [73]                                      |                   |                    |                                                                                                          |                                                                                                                                                                                                      |                 |                                                    | 5.6–5.6      | Gdańsk, [73]                              | <LOD           | Gdańsk, [73]       |
|                        | Imipramine     |                                       |                                                                                   |                         |                                                   |                   |                    |                                                                                                          |                                                                                                                                                                                                      |                 |                                                    | <LOD–<LOQ    | not given, [28,109,110]                   |                |                    |
|                        | Mirtazapine    |                                       |                                                                                   |                         |                                                   |                   |                    | <LOQ                                                                                                     | Warta, [81]                                                                                                                                                                                          |                 |                                                    | <LOQ         | Krajkowo, [81]                            |                |                    |
|                        | Sertraline     | <LOD                                  | Gdańsk, [95]                                                                      | <LOD                    | Gdańsk, [95]                                      |                   |                    | <LOD<br><LOD<br><LOQ                                                                                     | Radunia, [95]<br>Kacza, [95]<br>Warta, [81]                                                                                                                                                          |                 |                                                    | <LOD<br><LOQ | Gdańsk, [95]<br>Krajkowo, [81]            | <LOD           | Gdańsk, [95]       |

| PPCP group                                       | Compound      | Raw wastewater                                            |                                                                                         | Treated wastewater                                        |                                                                                                   | Landfill leachate |                    | Surface water                                                                                                                                                                                                                                    |                                                                                                                                                                                                                                                                                                                                                                                                                                                 | Seawater |                    | Groundwater                                    |                                                                                                               | Drinking water      |                              |
|--------------------------------------------------|---------------|-----------------------------------------------------------|-----------------------------------------------------------------------------------------|-----------------------------------------------------------|---------------------------------------------------------------------------------------------------|-------------------|--------------------|--------------------------------------------------------------------------------------------------------------------------------------------------------------------------------------------------------------------------------------------------|-------------------------------------------------------------------------------------------------------------------------------------------------------------------------------------------------------------------------------------------------------------------------------------------------------------------------------------------------------------------------------------------------------------------------------------------------|----------|--------------------|------------------------------------------------|---------------------------------------------------------------------------------------------------------------|---------------------|------------------------------|
|                                                  |               | ng/L                                                      | Location, [source]                                                                      | ng/L                                                      | Location, [source]                                                                                | ng/L              | Location, [source] | ng/L                                                                                                                                                                                                                                             | Location, [source]                                                                                                                                                                                                                                                                                                                                                                                                                              | ng/L     | Location, [source] | ng/L                                           | Location, [source]                                                                                            | ng/L                | Location, [source]           |
| Antidepressants (cont.)                          | Venlafaxine   | 89.8–153.5                                                | Kraków, [71]                                                                            | 110.8–190.3                                               | Kraków, [71]                                                                                      |                   |                    | <LOQ–12.1<br>24.5–170<br><LOQ–16                                                                                                                                                                                                                 | Warta, [81]<br>Drwina, [71]<br>Vistula, [71]                                                                                                                                                                                                                                                                                                                                                                                                    |          |                    | <LOQ                                           | Krajkowo, [81]                                                                                                |                     |                              |
| Antidiabetic drugs                               | Gilbenclamide | <LOD                                                      | Zabrze, [76]                                                                            |                                                           |                                                                                                   |                   |                    |                                                                                                                                                                                                                                                  |                                                                                                                                                                                                                                                                                                                                                                                                                                                 |          |                    |                                                |                                                                                                               |                     |                              |
|                                                  | Metformin     | 3818.7–16,790.7                                           | Gdańsk, [73]                                                                            | 7.5–62.9                                                  | Gdańsk, [73]                                                                                      |                   |                    | 55–88                                                                                                                                                                                                                                            | Warta, [99]                                                                                                                                                                                                                                                                                                                                                                                                                                     |          |                    | <LOQ<br>0.5–13.2                               | Krajkowo, [99]<br>Gdańsk, [73]                                                                                | 1.7–8               | Gdańsk, [73]                 |
| Antiepileptics                                   | Carbamazepine | 525<br><LOD–980<br>>LOD–1600<br><LOD–1230<br>695.6–3217.1 | Kraków, [84]<br>Silesia region, [89]<br>Zabrze, [76]<br>not given, [50]<br>Gdańsk, [73] | 485<br><LOD–1665.<br>90–190<br><LOD–2680<br>1665.6–5127.8 | Kraków, [82]<br>Bielsko–Biała, [75,91]<br>Silesia region, [89]<br>not given, [50]<br>Gdańsk, [73] | <LOD              | NE Poland, [50]    | <LOD–28.16<br>0.3–0.9<br><LOD–2.5<br>1–2.5<br>0.3–1.7<br><LOD–0.2<br><LOD–794<br><LOD<br><LOD<br><LOD<br><LOD<br><LOD<br><LOD<br><LOD<br>29.84–51.91<br><LOQ–43.97<br><LOQ<br><LOD<br><LOD<br><LOD<br>20–133<br>1798.1–2704.4<br>31–5260<br><LOD | Vistula, [43,75,80,91]<br>Pszczynka, [43]<br>Czarna Przemsza, [43]<br>Rawa, [43]<br>Brynica, [43]<br>Biała Przemsza, [43]<br>Warta, [63,75,81,91,98,99]<br>Odra, [75,91]<br>Brda, [75,91]<br>Kłodnica, [75,91]<br>Krzywa, [75,91]<br>Mała Panew, [75,91]<br>Troja, [75,91]<br>Toszecki Stream, [75,91]<br>Wierzycza, [80]<br>Łeba, [80]<br>Dębogórze Canal, [80]<br>Kozi Bród, [80]<br>Reda, [101]<br>Zagórska Struga, [101]<br>Płutnica, [101] | <LOD     | Bay of Puck, [101] | <LOD–869<br><LOQ–179<br><LOD<br>1–56.5<br><LOD | not given, [28,109,110]<br>Krajkowo, [63,81,99]<br>NE Poland, [50]<br>Gdańsk, [73]<br>Bay of Puck area, [101] | 2.1–6               | Gdańsk, [73]                 |
|                                                  | Gabapentin    |                                                           |                                                                                         |                                                           |                                                                                                   |                   |                    | 42–97                                                                                                                                                                                                                                            | Warta, [81,98]                                                                                                                                                                                                                                                                                                                                                                                                                                  |          |                    | <LOQ–61.7                                      | Krajkowo, [81]                                                                                                |                     |                              |
|                                                  | Lamotrigine   |                                                           |                                                                                         |                                                           |                                                                                                   |                   |                    | 35.8–45.1                                                                                                                                                                                                                                        | Warta, [81]                                                                                                                                                                                                                                                                                                                                                                                                                                     |          |                    | <LOQ–54                                        | Krajkowo, [81]                                                                                                |                     |                              |
|                                                  | Lorazepam     | <LOQ                                                      | Kraków, [71]                                                                            | <LOQ                                                      | Kraków, [71]                                                                                      |                   |                    |                                                                                                                                                                                                                                                  |                                                                                                                                                                                                                                                                                                                                                                                                                                                 |          |                    |                                                |                                                                                                               |                     |                              |
|                                                  | Phenytoin     |                                                           |                                                                                         |                                                           |                                                                                                   |                   |                    | <LOQ–17.62<br><LOQ<br><LOQ<br><LOQ<br><LOQ                                                                                                                                                                                                       | Wierzycza, [80]<br>Vistula, [80]<br>Łeba, [80]<br>Dębogórze Canal, [80]<br>Kozi Bród, [80]                                                                                                                                                                                                                                                                                                                                                      |          |                    |                                                |                                                                                                               |                     |                              |
|                                                  | Primidone     |                                                           |                                                                                         |                                                           |                                                                                                   |                   |                    | <LOQ                                                                                                                                                                                                                                             | Warta, [81]                                                                                                                                                                                                                                                                                                                                                                                                                                     |          |                    | <LOQ–12.4                                      | Krajkowo, [81]                                                                                                |                     |                              |
| Antifungal agents                                | Fluconazole   |                                                           |                                                                                         |                                                           |                                                                                                   |                   |                    | 32.5–51.7<br>5.1–636                                                                                                                                                                                                                             | Warta, [81]<br>Vistula, [74]                                                                                                                                                                                                                                                                                                                                                                                                                    |          |                    | <LOQ–51.6                                      | Krajkowo, [81]                                                                                                | 2–8.9               | Warsaw, [74]                 |
|                                                  | Thiabendazole | 18.4<br>11                                                | Tychy, [72]<br>Olsztyn, [72]                                                            | 22.3<br>25.5                                              | Tychy, [72]<br>Olsztyn, [72]                                                                      |                   |                    | 12–16<br><LOD–4.3<br>0.72–104                                                                                                                                                                                                                    | Gostynia, [72]<br>Łyna, [72]<br>Vistula, [74]                                                                                                                                                                                                                                                                                                                                                                                                   |          |                    |                                                |                                                                                                               | <LOD–1.9            | Warsaw, [74]                 |
| Antihistamines and histamine receptor modulators | Cimetidine    |                                                           |                                                                                         |                                                           |                                                                                                   |                   |                    | <LOQ                                                                                                                                                                                                                                             | Warta, [98]                                                                                                                                                                                                                                                                                                                                                                                                                                     |          |                    |                                                |                                                                                                               |                     |                              |
|                                                  | Fexofenadine  | 153.3–1853.2                                              | Kraków, [71]                                                                            | 374.6–748.4                                               | Kraków, [71]                                                                                      |                   |                    | 28.9–40.7<br>102.7–391.4<br>25.1–49.2                                                                                                                                                                                                            | Warta, [81]<br>Drwina, [71]<br>Vistula, [71]                                                                                                                                                                                                                                                                                                                                                                                                    |          |                    | <LOQ                                           | Krajkowo, [81]                                                                                                |                     |                              |
|                                                  | Ranitidine    | 312–5702.2                                                | Gdańsk, [73]                                                                            | 274–982.5                                                 | Gdańsk, [73]                                                                                      |                   |                    | <LOQ                                                                                                                                                                                                                                             | Warta, [81,98]                                                                                                                                                                                                                                                                                                                                                                                                                                  |          |                    | <LOQ<br>1.3–5.9                                | Krajkowo, [81]<br>Gdańsk, [73]                                                                                | 4.9–5.6             | Gdańsk, [73]                 |
| Antihypertensives                                | Almodipine    |                                                           |                                                                                         |                                                           |                                                                                                   |                   |                    | <LOD–19                                                                                                                                                                                                                                          | Vistula, [70]                                                                                                                                                                                                                                                                                                                                                                                                                                   |          |                    |                                                |                                                                                                               | <LOD–3.5            | Warsaw, [70]                 |
|                                                  | Enalapril     |                                                           |                                                                                         |                                                           |                                                                                                   |                   |                    | <LOD                                                                                                                                                                                                                                             | Vistula, [70]                                                                                                                                                                                                                                                                                                                                                                                                                                   |          |                    |                                                |                                                                                                               | <LOD                | Warsaw, [70]                 |
|                                                  | Irbesartan    | 9.3–3142.3                                                | Kraków, [71]                                                                            | 4.9–2863.1                                                | Kraków, [71]                                                                                      |                   |                    | <LOQ<br>43.5–6558.8<br>4.5–167.7                                                                                                                                                                                                                 | Warta, [81]<br>Drwina, [71]<br>Vistula, [71]                                                                                                                                                                                                                                                                                                                                                                                                    |          |                    | <LOQ                                           | Krajkowo, [81]                                                                                                |                     |                              |
|                                                  | Labetalol     |                                                           |                                                                                         |                                                           |                                                                                                   |                   |                    | <LOD–0.7                                                                                                                                                                                                                                         | Vistula, [70]                                                                                                                                                                                                                                                                                                                                                                                                                                   |          |                    |                                                |                                                                                                               | <LOD                | Warsaw, [70]                 |
|                                                  | Losartan      | 299.9–1708.8                                              | Gdańsk, [73]                                                                            | 75.6–265.2                                                | Gdańsk, [73]                                                                                      |                   |                    | 4.5–610                                                                                                                                                                                                                                          | Vistula, [70]                                                                                                                                                                                                                                                                                                                                                                                                                                   |          |                    | 6.3–16.3                                       | Gdańsk, [73]                                                                                                  | <LOD<br><LOD–5      | Gdańsk, [73]<br>Warsaw, [70] |
|                                                  | Nifedipine    |                                                           |                                                                                         |                                                           |                                                                                                   |                   |                    | <LOD–0.5                                                                                                                                                                                                                                         | Vistula, [70]                                                                                                                                                                                                                                                                                                                                                                                                                                   |          |                    |                                                |                                                                                                               | <LOD                | Warsaw, [70]                 |
|                                                  | Quinapril     |                                                           |                                                                                         |                                                           |                                                                                                   |                   |                    | <LOQ–155                                                                                                                                                                                                                                         | Vistula, [70]                                                                                                                                                                                                                                                                                                                                                                                                                                   |          |                    |                                                |                                                                                                               | <LOD–1.8            | Warsaw, [70]                 |
|                                                  | Ramipril      | 43.9–125.8                                                | Gdańsk, [73]                                                                            | 29.1–90.4                                                 | Gdańsk, [73]                                                                                      |                   |                    | 0.4–73                                                                                                                                                                                                                                           | Vistula, [70]                                                                                                                                                                                                                                                                                                                                                                                                                                   |          |                    | 2.3–3                                          | Gdańsk, [73]                                                                                                  | 2.2–2.8<br><LOD–0.8 | Gdańsk, [73]<br>Warsaw, [70] |
|                                                  | Telmisartan   |                                                           |                                                                                         |                                                           |                                                                                                   |                   |                    | 132–140<br>8–1130                                                                                                                                                                                                                                | Warta, [81]<br>Vistula, [70]                                                                                                                                                                                                                                                                                                                                                                                                                    |          |                    | <LOQ–62.5                                      | Krajkowo, [81]                                                                                                | <LOD–23             | Warsaw, [70]                 |
|                                                  | Valsartan     | 9137.2–92,532.7                                           | Kraków, [71]                                                                            | 3868.9–8157.7                                             | Kraków, [71]                                                                                      |                   |                    | 20–133<br>1798.1–2704.4<br>31–5260                                                                                                                                                                                                               | Warta, [81,98]<br>Drwina, [71]<br>Vistula, [70,71]                                                                                                                                                                                                                                                                                                                                                                                              |          |                    | <LOQ                                           | Krajkowo, [81]                                                                                                | <LOD–27             | Warsaw, [70]                 |
|                                                  | Verapamil     |                                                           |                                                                                         |                                                           |                                                                                                   |                   |                    | <LOD                                                                                                                                                                                                                                             | Vistula, [70]                                                                                                                                                                                                                                                                                                                                                                                                                                   |          |                    |                                                |                                                                                                               | <LOD                | Warsaw, [70]                 |

| PPCP group                | Compound          | Raw wastewater    |                                   | Treated wastewater |                                        | Landfill leachate |                    | Surface water                                                                                  |                                                                                                                                                                                                                | Seawater |                    | Groundwater              |                                                            | Drinking water     |                                  |
|---------------------------|-------------------|-------------------|-----------------------------------|--------------------|----------------------------------------|-------------------|--------------------|------------------------------------------------------------------------------------------------|----------------------------------------------------------------------------------------------------------------------------------------------------------------------------------------------------------------|----------|--------------------|--------------------------|------------------------------------------------------------|--------------------|----------------------------------|
|                           |                   | ng/L              | Location, [source]                | ng/L               | Location, [source]                     | ng/L              | Location, [source] | ng/L                                                                                           | Location, [source]                                                                                                                                                                                             | ng/L     | Location, [source] | ng/L                     | Location, [source]                                         | ng/L               | Location, [source]               |
| Antiischemic agents       | Trimetazidine     | 168–826.7         | Gdańsk, [73]                      | 21.8–457.8         | Gdańsk, [73]                           |                   |                    |                                                                                                |                                                                                                                                                                                                                |          |                    | 0.4–2.9                  | Gdańsk, [73]                                               | 0.4–4.2            | Gdańsk, [73]                     |
| Antiparasitics            | Flubendazole      |                   |                                   |                    |                                        |                   |                    | <LOD<br><LOD<br><LOD                                                                           | Drwęca, [100]<br>Wkra, [100]<br>Mławka, [100]                                                                                                                                                                  |          |                    |                          |                                                            |                    |                                  |
|                           | Ivermectin        |                   |                                   |                    |                                        |                   |                    | <LOQ                                                                                           | Warta, [81]                                                                                                                                                                                                    |          |                    | <LOQ                     | Krajkowo, [81]                                             |                    |                                  |
|                           | Mebendazole       |                   |                                   |                    |                                        |                   |                    | <LOD<br><LOD<br><LOD<br><LOD–9.8                                                               | Drwęca, [100]<br>Wkra, [100]<br>Mławka, [100]<br>Vistula, [74]                                                                                                                                                 |          |                    |                          |                                                            | <LOD               | Warsaw, [74]                     |
|                           | Sulfaquinoxalline |                   |                                   |                    |                                        |                   |                    | <LOD<br><LOD<br><LOD                                                                           | Drwęca, [100]<br>Wkra, [100]<br>Mławka, [100]                                                                                                                                                                  |          |                    |                          |                                                            |                    |                                  |
|                           | Tinidazole        |                   |                                   |                    |                                        |                   |                    | <LOD<br><LOD<br><LOD                                                                           | Drwęca, [100]<br>Wkra, [100]<br>Mławka, [100]                                                                                                                                                                  |          |                    |                          |                                                            |                    |                                  |
| Antiretroviral drugs      | Darunavir         |                   |                                   |                    |                                        |                   |                    | <LOD–169                                                                                       | Vistula, [74]                                                                                                                                                                                                  |          |                    |                          |                                                            | <LOD–3.4           | Warsaw, [74]                     |
| Antithrombotics           | Warfarin          |                   |                                   |                    |                                        |                   |                    | <LOQ                                                                                           | Warta, [81]                                                                                                                                                                                                    |          |                    | <LOQ                     | Krajkowo, [81]                                             |                    |                                  |
| Beta-blockers             | Acebutolol        |                   |                                   |                    |                                        |                   |                    | <LOQ<br><LOD<br>1.7–643                                                                        | Warta, [81]<br>Radunia, [105]<br>Vistula, [70]                                                                                                                                                                 |          |                    | <LOQ<br><LOD             | Krajkowo, [81]<br>Gdańsk, [105]                            | <LOD<br>0.2–4      | Gdańsk, [105]<br>Warsaw, [70]    |
|                           | Atenolol          | 116<br>97–503.2   | Szczecin, [17]<br>Gdańsk, [17,73] | 62<br>51.9–169     | Szczecin, [17]<br>Gdańsk, [17,73]      |                   |                    | <LOQ–22<br><LOD<br><LOD–205                                                                    | Warta, [81,98]<br>Radunia, [105]<br>Vistula, [70]                                                                                                                                                              |          |                    | <LOQ<br><LOD<br><LOD–2.5 | Krajkowo, [81]<br>not given, [109]<br>Gdańsk, [73,105]     | <LOD–1<br><LOD–1.5 | Gdańsk, [73,105]<br>Warsaw, [70] |
|                           | Bisoprolol        |                   |                                   |                    |                                        |                   |                    | <LOQ<br>2–1470                                                                                 | Warta, [81]<br>Vistula, [70]                                                                                                                                                                                   |          |                    | <LOQ                     | Krajkowo, [81]                                             | 1–17               | Warsaw, [70]                     |
|                           | Celiprolol        |                   |                                   |                    |                                        |                   |                    | <LOQ                                                                                           | Warta, [81]                                                                                                                                                                                                    |          |                    | <LOQ                     | Krajkowo, [81]                                             |                    |                                  |
|                           | Metoprolol        | 362               | Kraków, [84]                      | 1304<br>234–270    | Kraków, [84]<br>Bielsko–Biała, [75,91] |                   |                    | <LOD–2190<br><LOD<br><LOD<br><LOD<br><LOD<br><LOD<br><LOD<br><LOD<br><LOD<br><LOD–155          | Vistula [70,75,91]<br>Odra, [75,91]<br>Brda, [75,91]<br>Kłodnica, [75,91]<br>Krzywa, [75,91]<br>Mała Panew, [75,91]<br>Troja, [75,91]<br>Toszecki Stream, [75,91]<br>Radunia, [105]<br>Warta, [75,81,91,98,99] |          |                    | <LOD→LOD<br><LOQ<br><LOD | not given, [28,110]<br>Krajkowo, [81,99]<br>Gdańsk, [105]  | <LOD<br>0.5–14     | Gdańsk, [105]<br>Warsaw, [70]    |
|                           | Nadolol           |                   |                                   |                    |                                        |                   |                    | <LOD                                                                                           | Radunia, [105]                                                                                                                                                                                                 |          |                    | <LOD<br><LOD             | not given, [28,109,110]<br>Gdańsk, [105]                   | <LOD               | Gdańsk, [105]                    |
|                           | Pindolol          |                   |                                   |                    |                                        |                   |                    | <LOD                                                                                           | Radunia, [105]                                                                                                                                                                                                 |          |                    | <LOD<br><LOD             | not given, [28,109,110]<br>Gdańsk, [105]                   | <LOD               | Gdańsk, [105]                    |
|                           | Propranolol       | <LOD              | Kraków, [84]                      | <LOD<br><LOQ       | Kraków, [82]<br>Bielsko–Biała, [75,91] |                   |                    | <LOD–69<br><LOD<br><LOD→LOQ<br><LOQ<br><LOD<br><LOD<br><LOD<br><LOD<br><LOD<br><LOD<br><LOD    | Vistula [70,75,91]<br>Odra, [75,91]<br>Warta, [75,81,91,98]<br>Brda, [75,91]<br>Kłodnica, [75,91]<br>Krzywa, [75,91]<br>Mała Panew, [75,91]<br>Troja, [75,91]<br>Toszecki Stream, [75,91]<br>Radunia, [105]    |          |                    | <LOQ→LOD<br><LOQ<br><LOD | not given, [28,109,110]<br>Krajkowo, [81]<br>Gdańsk, [105] | <LOD<br><LOD–4     | Gdańsk, [105]<br>Warsaw, [70]    |
|                           | Sotalol           |                   |                                   | <LOD               | Bielsko–Biała, [75,91]                 |                   |                    | 14.3–50.3<br><LOD–2120<br><LOD<br><LOD<br><LOD<br><LOD<br><LOD<br><LOD<br><LOD<br><LOD<br><LOD | Warta, [81]<br>Vistula [70,75,91]<br>Odra, [75,91]<br>Warta, [75,91]<br>Brda, [75,91]<br>Kłodnica, [75,91]<br>Krzywa, [75,91]<br>Mała Panew, [75,91]<br>Troja, [75,91]<br>Toszecki Stream, [75,91]             |          |                    | <LOQ–14.1                | Krajkowo, [81]                                             | <LOD–16            | Warsaw, [70]                     |
| Bet68–adrenergic agonists | Salbutamol        |                   |                                   |                    |                                        |                   |                    | <LOD<br><LOQ                                                                                   | Radunia, [105]<br>Warta, [98]                                                                                                                                                                                  |          |                    | <LOD→LOQ<br><LOD         | not given, [28,109,110]<br>Gdańsk, [105]                   | <LOD               | Gdańsk, [105]                    |
|                           | Terbutaline       |                   |                                   |                    |                                        |                   |                    | <LOD                                                                                           | Radunia, [105]                                                                                                                                                                                                 |          |                    | <LOD<br><LOD             | not given, [28,109,110]<br>Gdańsk, [105]                   | <LOD               | Gdańsk, [105]                    |
| Chemotherapeutic agents   | Cyclophosphamide  | 9.3–33.3<br><LOD  | Gdańsk, [73]<br>Zabrze, [76]      | 1–24               | Gdańsk, [73]                           |                   |                    | <LOQ                                                                                           | Warta, [81]                                                                                                                                                                                                    |          |                    | <LOQ<br>2.6–3.6          | Krajkowo, [81]<br>Gdańsk, [73]                             | <LOD               | Gdańsk, [73]                     |
|                           | Ifosfamide        | 10.1–27.3<br><LOD | Gdańsk, [73]<br>Zabrze, [76]      | 2.2–28             | Gdańsk, [73]                           |                   |                    |                                                                                                |                                                                                                                                                                                                                |          |                    | <LOD                     | Gdańsk, [73]                                               | <LOD               | Gdańsk, [73]                     |

| PPCP group                                | Compound            | Raw wastewater                      |                                                 | Treated wastewater  |                                 | Landfill leachate |                    | Surface water                                                                              |                                                                                                                                                                                  | Seawater |                    | Groundwater      |                                | Drinking water   |                                 |
|-------------------------------------------|---------------------|-------------------------------------|-------------------------------------------------|---------------------|---------------------------------|-------------------|--------------------|--------------------------------------------------------------------------------------------|----------------------------------------------------------------------------------------------------------------------------------------------------------------------------------|----------|--------------------|------------------|--------------------------------|------------------|---------------------------------|
|                                           |                     | ng/L                                | Location, [source]                              | ng/L                | Location, [source]              | ng/L              | Location, [source] | ng/L                                                                                       | Location, [source]                                                                                                                                                               | ng/L     | Location, [source] | ng/L             | Location, [source]             | ng/L             | Location, [source]              |
| Contrast agents                           | Diatrizoate         | <LOD–6900                           | Zabrze, [76]                                    |                     |                                 |                   |                    |                                                                                            |                                                                                                                                                                                  |          |                    |                  |                                |                  |                                 |
|                                           | Iohexol             | <LOD–5800                           | Zabrze, [76]                                    |                     |                                 |                   |                    | <LOQ–485                                                                                   | Warta, [81,99]                                                                                                                                                                   |          |                    | <LOQ–184         | Krajkowo, [81,99]              |                  |                                 |
|                                           | Iomeprol            | <LOD–13,000                         | Zabrze, [76]                                    |                     |                                 |                   |                    | <LOQ–159                                                                                   | Warta, [81,99]                                                                                                                                                                   |          |                    | <LOQ             | Krajkowo, [81,99]              |                  |                                 |
|                                           | Iopamidol           | <LOD–2200                           | Zabrze, [76]                                    |                     |                                 |                   |                    | <LOQ                                                                                       | Warta, [81]                                                                                                                                                                      |          |                    | <LOQ             | Krajkowo, [81]                 |                  |                                 |
|                                           | Iopromide           | <LOD–27,000                         | Zabrze, [76]                                    |                     |                                 |                   |                    | <LOQ–413                                                                                   | Warta, [81,99]                                                                                                                                                                   |          |                    | <LOQ             | Krajkowo, [81,99]              |                  |                                 |
| Corrosion inhibitors                      | 1H–Benzotriazole    |                                     |                                                 |                     |                                 |                   |                    | <LOQ–140                                                                                   | Warta, [63,99]                                                                                                                                                                   |          |                    | <LOQ–180         | Krajkowo, [63,99]              |                  |                                 |
|                                           | Tolyltriazole       |                                     |                                                 |                     |                                 |                   |                    | 30                                                                                         | Warta, [63]                                                                                                                                                                      |          |                    | <LOQ–40          | Krajkowo, [63]                 |                  |                                 |
| Corticosteroids                           | Dexamethasone       |                                     |                                                 | <LOD                | Bielsko–Biała, [75,91]          |                   |                    | <LOD<br><LOD<br><LOD<br><LOD<br><LOD<br><LOD<br><LOD<br><LOD<br><LOD                       | Vistula [75,91]<br>Odra, [75,91]<br>Warta, [75,91]<br>Brda, [75,91]<br>Kłodnica, [75,91]<br>Krzywa, [75,91]<br>Mała Panew, [75,91]<br>Troja, [75,91]<br>Toszecki Stream, [75,91] |          |                    |                  |                                |                  |                                 |
|                                           | Flumetasone         |                                     |                                                 |                     |                                 |                   |                    | <LOD<br><LOD<br><LOD                                                                       | Drwęca, [100]<br>Wkra, [100]<br>Mławka, [100]                                                                                                                                    |          |                    |                  |                                |                  |                                 |
|                                           | Prednisolone        |                                     |                                                 | <LOD                | Bielsko–Biała, [75,91]          |                   |                    | <LOD<br><LOD<br><LOD<br><LOD<br><LOD<br><LOD<br><LOD<br><LOD<br><LOD                       | Vistula [75,91]<br>Odra, [75,91]<br>Warta, [75,91]<br>Brda, [75,91]<br>Kłodnica, [75,91]<br>Krzywa, [75,91]<br>Mała Panew, [75,91]<br>Troja, [75,91]<br>Toszecki Stream, [75,91] |          |                    |                  |                                |                  |                                 |
| Cosmetic and pharmaceutical preservatives | Butylparaben        | 10–710<br>68.8–710.7                | not given, [50]<br>Kraków, [71]                 | <LOD–40<br><LOQ–4.3 | not given, [50]<br>Kraków, [71] | <LOD–6670         | NE Poland, [49,50] | 2.7–23.6<br>2.1–7.6                                                                        | Drwina, [71]<br>Vistula, [71]                                                                                                                                                    |          |                    | <LOD–40          | NE Poland, [49,50,111]         |                  |                                 |
|                                           | Ethylparaben        | <LOD–4150<br>791.2–8169.4           | not given, [50]<br>Kraków, [71]                 | <LOD–20<br><LOQ     | not given, [50]<br>Kraków, [71] | <LOD–9380         | NE Poland, [49,50] | 0.9–349<br>0.8–1.7                                                                         | Drwina, [71]<br>Vistula, [71]                                                                                                                                                    |          |                    | <LOQ–86          | NE Poland, [49,50]             |                  |                                 |
|                                           | Methylparaben       | <LOD–5030<br>2235–40,898.6          | not given , [50]<br>Kraków, [71]                | 20–1440<br>6.2–10.9 | not given, [50]<br>Kraków, [71] | <LOD–17,150       | NE Poland, [49,50] | 10.6–616.9<br>10.3–29.6                                                                    | Drwina, [71]<br>Vistula, [71]                                                                                                                                                    |          |                    | <LOD–2880        | NE Poland, [49,50]             |                  |                                 |
|                                           | Propylparaben       | <LOD–2730<br>524.2–7803.3           | not given, [50]<br>Kraków, [71]                 | <LOD–390<br><LOQ    | not given, [50]<br>Kraków, [71] | <LOD–5900         | NE Poland, [49,50] | 1–165.7<br>0.9–1.3                                                                         | Drwina, [71]<br>Vistula, [71]                                                                                                                                                    |          |                    | <LOD–25          | NE Poland, [49,50,111]         |                  |                                 |
| Diuretics                                 | Chlorothiazide      |                                     |                                                 |                     |                                 |                   |                    | <LOQ                                                                                       | Warta, [63]                                                                                                                                                                      |          |                    | <LOQ–10          | Krajkowo, [63]                 |                  |                                 |
|                                           | Furosemide          | <LOD–3372.5                         | Gdańsk, [73,82]                                 | <LOD–1879.2         | Gdańsk, [73,82]                 |                   |                    | <LOQ<br><LOD<br><LOD–2670                                                                  | Warta, [81]<br>Radunia, [82]<br>Vistula, [70]                                                                                                                                    |          |                    | <LOQ<br><LOD     | Krajkowo, [81]<br>Gdańsk, [73] | <LOD<br><LOD–29  | Gdańsk, [73,82]<br>Warsaw, [70] |
|                                           | Hydrochlorothiazide | 484.6–5072.3                        | Gdańsk, [73]                                    | 207.3–4313.7        | Gdańsk, [73]                    |                   |                    | <LOQ<br><LOQ–1270                                                                          | Warta, [81]<br>Vistula, [70]                                                                                                                                                     |          |                    | <LOQ<br>0.4–27.7 | Krajkowo, [81]<br>Gdańsk, [73] | 2.5–2.9<br>19–26 | Gdańsk, [73]<br>Warsaw, [70]    |
| Fibrates                                  | Bezafibrate         | >LOD–1000<br><LOQ–240<br><LOD–145.9 | Zabrze, [76]<br>Poznań, [44]<br>Kraków, [71,96] | <LOQ–37<br>20.3–73  | Poznań, [44]<br>Kraków, [71,96] |                   |                    | <LOQ–16<br>9.44–64.15<br><LOQ–54.90<br><LOQ–19.60<br><LOQ–34.50<br><LOQ–27.02<br>20.8–34.5 | Warta, [44,81]<br>Wierzyca, [80]<br>Vistula, [70,71,80]<br>Łeba, [80]<br>Dębogórze Canal, [80]<br>Kozi Bród, [80]<br>Drwina, [71]                                                |          |                    | <LOQ             | Krajkowo, [81]                 | <LOD             | Warsaw, [70]                    |
|                                           | Ciprofibrate        |                                     |                                                 |                     |                                 |                   |                    | <LOD–60                                                                                    | Vistula, [70]                                                                                                                                                                    |          |                    |                  |                                | <LOD             | Warsaw, [70]                    |
|                                           | Clofibric acid      | <LOD<br><LOQ–71<br><LOD–80          | Kraków, [84]<br>Poznań, [44]<br>Zabrze, [76]    | 395<br><LOQ         | Kraków, [84]<br>Poznań, [44]    |                   |                    | <LOQ–8<br><LOD–130                                                                         | Warta, [44,81]<br>Vistula, [70]                                                                                                                                                  |          |                    | <LOQ             | Krajkowo, [81]                 | <LOD–1.3         | Warsaw, [70]                    |
|                                           | Etofibrate          | <LOD                                | Zabrze, [76]                                    |                     |                                 |                   |                    |                                                                                            |                                                                                                                                                                                  |          |                    |                  |                                |                  |                                 |
|                                           | Fenofibrate         |                                     |                                                 |                     |                                 |                   |                    | <LOD–0.9                                                                                   | Vistula, [70]                                                                                                                                                                    |          |                    |                  |                                | <LOD–1.1         | Warsaw, [70]                    |
|                                           | Gemfibrozil         | <LOD–220                            | Zabrze, [76]                                    |                     |                                 |                   |                    | <LOQ<br><LOQ–26.34<br><LOQ–39.15<br><LOQ–43.24<br><LOQ–39.37<br>18.35–24.33                | Warta, [81]<br>Wierzyca, [80]<br>Vistula, [70,80]<br>Łeba, [80]<br>Dębogórze Canal, [80]<br>Kozi Bród, [80]                                                                      |          |                    | <LOQ             | Krajkowo, [81]                 | <LOD             | Warsaw, [70]                    |

| PPCP group                  | Compound                      | Raw wastewater                         |                                                                      | Treated wastewater              |                                                                      | Landfill leachate |                    | Surface water                                                                                    |                                                                                                                                                          | Seawater |                    | Groundwater                  |                                                                    | Drinking water |                    |
|-----------------------------|-------------------------------|----------------------------------------|----------------------------------------------------------------------|---------------------------------|----------------------------------------------------------------------|-------------------|--------------------|--------------------------------------------------------------------------------------------------|----------------------------------------------------------------------------------------------------------------------------------------------------------|----------|--------------------|------------------------------|--------------------------------------------------------------------|----------------|--------------------|
|                             |                               | ng/L                                   | Location, [source]                                                   | ng/L                            | Location, [source]                                                   | ng/L              | Location, [source] | ng/L                                                                                             | Location, [source]                                                                                                                                       | ng/L     | Location, [source] | ng/L                         | Location, [source]                                                 | ng/L           | Location, [source] |
| Hormones                    | 17 $\alpha$ -Ethinylestradiol | <LOD                                   | Gdańsk, [87]                                                         | <LOD                            | Gdańsk, [87]                                                         |                   |                    | <LOQ<br><LOQ<br><LOD–19.14<br><LOQ–27.15<br>12.84–36.12<br><LOQ–21.05<br><LOQ–26.31<br>10.5–16.5 | Odra, [51]<br>Gliwicki Canal, [51]<br>Wierzyca, [80,87]<br>Vistula, [51,71,80]<br>Łeba, [80]<br>Dębogórze Canal, [80]<br>Kozi Bród, [80]<br>Drwina, [71] |          |                    | <LOD–61                      | not given, [28,109,110]                                            |                |                    |
|                             | 17 $\beta$ -Estradiol         | <LOD–914<br>1114<br><LOD<br>4.6–1067.8 | Gdańsk, [17,87]<br>Szczecin, [17]<br>not given, [50]<br>Kraków, [71] | <LOD–227<br>432<br><LOD<br><LOQ | Gdańsk, [17,87]<br>Szczecin, [17]<br>not given, [50]<br>Kraków, [71] | <LOD–280          | NE Poland, [49,50] | <LOQ<br><LOQ<br><LOD<br><LOD–34.18<br><LOQ–41.50<br><LOQ–24.98<br>14.37–46.15<br>24.86–28.31     | Odra, [51]<br>Kanał Gliwicki, [51]<br>Radunia, [105]<br>Wierzyca, [80,87]<br>Vistula, [51,80]<br>Łeba, [80]<br>Dębogórze Canal, [80]<br>Kozi Bród, [80]  |          |                    | <LOD–>LOD<br><LOD<br><LOD–48 | not given, [28,109,110]<br>Gdańsk, [105]<br>NE Poland, [49,50,111] | <LOD           | Gdańsk, [105]      |
|                             | Androstenedione               |                                        |                                                                      |                                 |                                                                      |                   |                    | <LOQ–81.15<br><LOQ<br><LOQ–78.15<br><LOQ<br><LOQ                                                 | Wierzyca, [80]<br>Vistula, [80]<br>Łeba, [80]<br>Dębogórze Canal, [80]<br>Kozi Bród, [80]                                                                |          |                    |                              |                                                                    |                |                    |
|                             | Diethylstilboestrol           | <LOD<br><LOD                           | not given, [50]<br>Gdańsk, [87]                                      | <LOD<br><LOD                    | not given, [50]<br>Gdańsk, [87]                                      | <LOD              | NE Poland, [50]    | <LOD<br><LOD–39.87<br>35.98–64.15<br>15.47–59.18<br>17.36–84.15<br>43.61–51.16                   | Radunia, [105]<br>Wierzyca, [80,87]<br>Vistula, [80]<br>Łeba, [80]<br>Dębogórze Canal, [80]<br>Kozi Bród, [80]                                           |          |                    | <LOD<br><LOD                 | Gdańsk, [105]<br>NE Poland, [49,111]                               | <LOD           | Gdańsk, [105]      |
|                             | Estriol                       | <LOD                                   | Gdańsk, [87]                                                         | <LOD                            | Gdańsk, [87]                                                         |                   |                    | <LOD<br><LOD–28.19<br><LOQ–42.60<br><LOQ–11.93<br><LOQ<br><LOQ–69.15                             | Radunia, [105]<br>Wierzyca, [80,86]<br>Vistula, [80]<br>Łeba, [80]<br>Dębogórze Canal, [80]<br>Kozi Bród, [80]                                           |          |                    | <LOD–>LOD<br><LOD            | not given, [28,109,110]<br>Gdańsk, [105]                           | <LOD           | Gdańsk, [105]      |
|                             | Estrone                       | <LOD–567<br>732<br><LOD<br>41.4–773.3  | Gdańsk, [17,87]<br>Szczecin, [17]<br>not given, [50]<br>Kraków, [71] | <LOD–249<br>236<br><LOD<br><LOQ | Gdańsk, [17,87]<br>Szczecin, [17]<br>not given, [50]<br>Kraków, [71] | <LOD–1100         | NE Poland, [49,50] | 1.3<br>1.1<br><LOD–21.60<br><LOQ–21.17<br><LOQ–14.87<br><LOQ–24.18<br><LOQ–47.16<br>22.7–39.1    | Odra, [51]<br>Kanał Gliwicki, [51]<br>Wierzyca, [80,86]<br>Vistula, [51,80]<br>Łeba, [80]<br>Dębogórze Canal, [80]<br>Kozi Bród, [80]<br>Drwina, [71]    |          |                    | <LOD–69<br><LOD–310          | not given, [28,109,110]<br>NE Poland, [49,50,111]                  |                |                    |
|                             | Equilin                       |                                        |                                                                      |                                 |                                                                      |                   |                    | <LOQ–14.31<br><LOQ–9.46<br><LOQ–7.91<br><LOQ<br><LOQ                                             | Wierzyca, [80]<br>Vistula, [80]<br>Łeba, [80]<br>Dębogórze Canal, [80]<br>Kozi Bród, [80]                                                                |          |                    |                              |                                                                    |                |                    |
|                             | Levonorgestrel                | 51.1–1529.8                            | Gdańsk, [73]                                                         | <LOD                            | Gdańsk, [73]                                                         |                   |                    |                                                                                                  |                                                                                                                                                          |          |                    | <LOQ                         | Gdańsk, [73]                                                       | 20.4–46.4      | Gdańsk, [73]       |
|                             | Norethisterone                |                                        |                                                                      |                                 |                                                                      |                   |                    | <LOQ–37.15<br>13.17–47.62<br>24.60–61.37<br><LOQ–51.14<br><LOQ–49.87                             | Wierzyca, [80]<br>Vistula, [80]<br>Łeba, [80]<br>Dębogórze Canal, [80]<br>Kozi Bród, [80]                                                                |          |                    |                              |                                                                    |                |                    |
|                             | Progesterone                  | 41.3–89.6                              | Gdańsk, [73]                                                         | 9.4–13.4                        | Gdańsk, [73]                                                         |                   |                    | <LOQ–30.14<br>19.19–47.90<br><LOQ–52.84<br><LOQ–47.03<br>28.42–58.94                             | Wierzyca, [80]<br>Vistula, [80]<br>Łeba, [80]<br>Dębogórze Canal, [80]<br>Kozi Bród, [80]                                                                |          |                    | 3.3–4.4                      | Gdańsk, [73]                                                       | 4.1–4.8        | Gdańsk, [73]       |
|                             | Testosterone                  |                                        |                                                                      |                                 |                                                                      |                   |                    |                                                                                                  |                                                                                                                                                          |          |                    | <LOD–<LOQ                    | not given, [28,109,110]                                            |                |                    |
| Hypnotics                   | Nitrazepam                    | <LOQ                                   | Kraków, [71]                                                         | <LOQ                            | Kraków, [71]                                                         |                   |                    |                                                                                                  |                                                                                                                                                          |          |                    |                              |                                                                    |                |                    |
|                             | Temazepam                     | 57–145.5                               | Kraków, [71]                                                         | 54–257                          | Kraków, [71]                                                         |                   |                    | 58–109.5<br><LOQ–21                                                                              | Drwina, [71]<br>Vistula, [71]                                                                                                                            |          |                    |                              |                                                                    |                |                    |
| Immunosuppressiv<br>e drugs | Mycophenolic acid             |                                        |                                                                      |                                 |                                                                      |                   |                    | <LOD–179.6<br>1.3–130.4                                                                          | Vistula, [77]<br>Utrata, [77]                                                                                                                            |          |                    |                              |                                                                    | <LOD           | Warsaw, [77]       |
|                             | Tacrolimus                    |                                        |                                                                      |                                 |                                                                      |                   |                    | <LOD<br><LOD                                                                                     | Vistula, [77]<br>Utrata, [77]                                                                                                                            |          |                    |                              |                                                                    | <LOD           | Warsaw, [77]       |

| PPCP group             | Compound                         | Raw wastewater |                    | Treated wastewater |                    | Landfill leachate |                    | Surface water                                                 |                                                                                           | Seawater |                    | Groundwater |                     | Drinking water |                              |
|------------------------|----------------------------------|----------------|--------------------|--------------------|--------------------|-------------------|--------------------|---------------------------------------------------------------|-------------------------------------------------------------------------------------------|----------|--------------------|-------------|---------------------|----------------|------------------------------|
|                        |                                  | ng/L           | Location, [source] | ng/L               | Location, [source] | ng/L              | Location, [source] | ng/L                                                          | Location, [source]                                                                        | ng/L     | Location, [source] | ng/L        | Location, [source]  | ng/L           | Location, [source]           |
| Lipid-modifying agents | Atorvastatin                     | 278.6–2756.5   | Kraków, [71]       | 49.7 –102.2        | Kraków, [71]       |                   |                    | 68.3–132.6<br><LOD–114                                        | Drwina, [71]<br>Vistula, [70,71]                                                          |          |                    |             |                     | <LOD–0.3       | Warsaw, [70]                 |
|                        | Lovastatin                       |                |                    |                    |                    |                   |                    | <LOQ<br><LOD                                                  | Warta, [81]<br>Vistula, [70]                                                              |          |                    | <LOQ        | Krajkowo, [81]      | <LOD           | Warsaw, [70]                 |
|                        | Pravastatin                      | <LOD           | Gdańsk, [73]       | <LOD               | Gdańsk, [73]       |                   |                    | <LOD                                                          | Vistula, [70]                                                                             |          |                    | <LOD        | Gdańsk, [73]        | <LOD<br><LOD   | Gdańsk, [73]<br>Warsaw, [70] |
|                        | Simvastatin                      |                |                    |                    |                    |                   |                    | <LOQ<br><LOD                                                  | Warta, [81,98]<br>Vistula, [70]                                                           |          |                    | <LOQ        | Krajkowo, [81]      | <LOD           | Warsaw, [70]                 |
| Metabolites            | 17 $\alpha$ -hydroksyprogesteron |                |                    |                    |                    |                   |                    | <LOQ–27.16<br>27.46–40.15<br><LOQ–17.85<br><LOQ–34.15<br><LOQ | Wierzyca, [80]<br>Vistula, [80]<br>Łeba, [80]<br>Dębogórze Canal, [80]<br>Kozi Bród, [80] |          |                    |             |                     |                |                              |
|                        | 4–n–nonylphenol                  | <LOD–690       | not given, [50]    | <LOD               | not given, [50]    | <LOD–6120         | NE Poland, [50]    |                                                               |                                                                                           |          |                    | <LOD–9      | NE Poland, [50,111] |                |                              |
|                        | 4–n–octylphenol                  | <LOD–850       | not given, [50]    | <LOD–770           | not given, [50]    | <LOD–60           | NE Poland, [50]    |                                                               |                                                                                           |          |                    | <LOD–25     | NE Poland, [50,111] |                |                              |
|                        | ATH                              | <LOD           | Zabrze, [76]       |                    |                    |                   |                    |                                                               |                                                                                           |          |                    |             |                     |                |                              |
|                        | Benzoylcegonine                  | 38.3–87.3      | Kraków, [71]       | 5.8–11.5           | Kraków, [71]       |                   |                    | <LOQ<br>6–33.5<br>1.5–2.5<br><LOD                             | Warta, [98]<br>Drwina, [71]<br>Vistula, [71]<br>Wierzyca, [87]                            |          |                    |             |                     |                |                              |
|                        | Carbamazepine<br>10,11–dihydroxy |                |                    |                    |                    |                   |                    | <LOQ                                                          | Warta, [81]                                                                               |          |                    | <LOQ        | Krajkowo, [81]      |                |                              |
|                        | Carbamazepine<br>2–hydroxy       |                |                    |                    |                    |                   |                    | <LOQ                                                          | Warta, [81]                                                                               |          |                    | <LOQ        | Krajkowo, [81]      |                |                              |
|                        | Cocaethylene                     | <LOQ–3.5       | Kraków, [71]       | <LOQ               | Kraków, [71]       |                   |                    |                                                               |                                                                                           |          |                    |             |                     |                |                              |
|                        | Cotinine                         | 821.5–1855     | Kraków, [71]       | 7.3–44             | Kraków, [71]       |                   |                    | <LOQ–50.8<br>9–672.5<br>11.5–1361                             | Warta, [81]<br>Drwina, [71]<br>Vistula, [71]                                              |          |                    | <LOQ        | Krajkowo, [81]      |                |                              |
|                        | Creatinine                       |                |                    |                    |                    |                   |                    | 140.5–686<br><LOQ–85.5                                        | Drwina, [71]<br>Vistula, [71]                                                             |          |                    |             |                     |                |                              |
|                        | DAMI                             | <LOD–490       | Zabrze, [76]       |                    |                    |                   |                    |                                                               |                                                                                           |          |                    |             |                     |                |                              |
|                        | Diclofenac–4'–hydroxy            |                |                    |                    |                    |                   |                    | <LOQ                                                          | Warta, [81]                                                                               |          |                    | <LOQ        | Krajkowo, [81]      |                |                              |
|                        | Dihydrocodeine                   | <LOQ           | Kraków, [71]       | <LOQ–5.8           | Kraków, [71]       |                   |                    | 1.5–3.5<br>1–3                                                | Drwina, [71]<br>Vistula, [71]                                                             |          |                    |             |                     |                |                              |
|                        | Dihydromorphine                  | <LOQ           | Kraków, [71]       | <LOQ               | Kraków, [71]       |                   |                    |                                                               |                                                                                           |          |                    |             |                     |                |                              |
|                        | Dimethyl–<br>aminophenazone      | <LOD           | Zabrze, [76]       |                    |                    |                   |                    |                                                               |                                                                                           |          |                    |             |                     |                |                              |
|                        | EDDP                             | 1.8–4.8        | Kraków, [71]       | 1.8–4              | Kraków, [71]       |                   |                    | <LOQ–3<br><LOQ                                                | Drwina, [71]<br>Vistula, [71]                                                             |          |                    |             |                     |                |                              |
|                        | Erythromycin–15O                 |                |                    |                    |                    |                   |                    | <LOQ                                                          | Warta, [98]                                                                               |          |                    |             |                     |                |                              |
|                        | HMMA                             | <LOQ           | Kraków, [71]       | <LOQ               | Kraków, [71]       |                   |                    |                                                               |                                                                                           |          |                    |             |                     |                |                              |
|                        | Ibuprofen–2–hydroxy              | >LOD–5100      | Zabrze, [76]       |                    |                    |                   |                    | <LOQ                                                          | Warta, [81]                                                                               |          |                    | <LOQ        | Krajkowo, [81]      |                |                              |
|                        | Ibuprofen–carboxy                |                |                    |                    |                    |                   |                    | <LOQ                                                          | Warta, [81]                                                                               |          |                    | <LOQ        | Krajkowo, [81]      |                |                              |
|                        | N–acetyl–<br>sulfamethoxazole    | 1358–1763      | Gdańsk, [88]       | <LOD–16            | Gdańsk, [88]       |                   |                    |                                                               |                                                                                           |          |                    |             |                     |                |                              |
|                        | Naproxene–o–desmethyl            |                |                    |                    |                    |                   |                    | <LOQ                                                          | Warta, [81]                                                                               |          |                    | <LOQ        | Krajkowo, [81]      |                |                              |
|                        | Nordiazepam                      | <LOQ           | Kraków, [71]       | <LOQ               | Kraków, [71]       |                   |                    |                                                               |                                                                                           |          |                    |             |                     |                |                              |
|                        | Norephedrine                     | <LOQ–8         | Kraków, [71]       | <LOQ–4.8           | Kraków, [71]       |                   |                    |                                                               |                                                                                           |          |                    |             |                     |                |                              |
|                        | Norketamine                      | <LOQ           | Kraków, [71]       | <LOQ               | Kraków, [71]       |                   |                    | 1–62.5<br>1.5–55                                              | Drwina, [71]<br>Vistula, [71]                                                             |          |                    |             |                     |                |                              |
|                        | Normorphine                      | <LOQ           | Kraków, [71]       | <LOQ               | Kraków, [71]       |                   |                    |                                                               |                                                                                           |          |                    |             |                     |                |                              |
|                        | Noroxycodone                     | <LOQ           | Kraków, [71]       | <LOQ               | Kraków, [71]       |                   |                    |                                                               |                                                                                           |          |                    |             |                     |                |                              |
|                        | O–desmethyltramadol              | 276.8–453      | Kraków, [71]       | 566.8–1167.3       | Kraków, [71]       |                   |                    | 257.5–636<br>91.5–120.5                                       | Drwina, [71]<br>Vistula, [71]                                                             |          |                    |             |                     |                |                              |
|                        | Oxazepam                         | 211.5–269      | Kraków, [71]       | 207.3–274          | Kraków, [71]       |                   |                    | 238–436<br>260.5–2344                                         | Drwina, [71]<br>Vistula, [71]                                                             |          |                    |             |                     |                |                              |
|                        | Oxcarbazepine                    |                |                    |                    |                    |                   |                    | <LOQ                                                          | Warta, [81]                                                                               |          |                    | <LOQ        | Krajkowo, [81]      |                |                              |

| PPCP group                               | Compound              | Raw wastewater                                                                       |                                                                                                                                    | Treated wastewater                                            |                                                                                                               | Landfill leachate |                    | Surface water                                                                                                                                                                                                                                                                                    |                                                                                                                                                                                                                                                                                                                                                                                                                                                                                                                                                                                                          | Seawater               |                                                | Groundwater                                                |                                                                                                                 | Drinking water  |                                       |
|------------------------------------------|-----------------------|--------------------------------------------------------------------------------------|------------------------------------------------------------------------------------------------------------------------------------|---------------------------------------------------------------|---------------------------------------------------------------------------------------------------------------|-------------------|--------------------|--------------------------------------------------------------------------------------------------------------------------------------------------------------------------------------------------------------------------------------------------------------------------------------------------|----------------------------------------------------------------------------------------------------------------------------------------------------------------------------------------------------------------------------------------------------------------------------------------------------------------------------------------------------------------------------------------------------------------------------------------------------------------------------------------------------------------------------------------------------------------------------------------------------------|------------------------|------------------------------------------------|------------------------------------------------------------|-----------------------------------------------------------------------------------------------------------------|-----------------|---------------------------------------|
|                                          |                       | ng/L                                                                                 | Location, [source]                                                                                                                 | ng/L                                                          | Location, [source]                                                                                            | ng/L              | Location, [source] | ng/L                                                                                                                                                                                                                                                                                             | Location, [source]                                                                                                                                                                                                                                                                                                                                                                                                                                                                                                                                                                                       | ng/L                   | Location, [source]                             | ng/L                                                       | Location, [source]                                                                                              | ng/L            | Location, [source]                    |
| Metabolites<br>(cont.)                   | Oxypurinol            |                                                                                      |                                                                                                                                    |                                                               |                                                                                                               |                   |                    | 388–1050                                                                                                                                                                                                                                                                                         | Warta, [81]                                                                                                                                                                                                                                                                                                                                                                                                                                                                                                                                                                                              |                        |                                                | <LOQ–1350                                                  | Krajkowo, [81]                                                                                                  |                 |                                       |
|                                          | Paraxanthine          | 94,035.3–174,336.8                                                                   | Kraków, [71]                                                                                                                       | 92.5–1881.3                                                   | Kraków, [71]                                                                                                  |                   |                    | <LOQ–1470<br>271.5–90,665<br>582–966                                                                                                                                                                                                                                                             | Warta, [81]<br>Drwina, [71]<br>Vistula, [71]                                                                                                                                                                                                                                                                                                                                                                                                                                                                                                                                                             |                        |                                                | <LOQ                                                       | Krajkowo, [81]                                                                                                  |                 |                                       |
|                                          | Salicylic acid        | 12,765<br>87.2–27,014.2                                                              | Kraków, [84]<br>Gdańsk, [73,87]                                                                                                    | 236–452<br>227–270<br>60.9–470                                | Kraków, [84,92]<br>Bielsko–Biała, [75,91]<br>Gdańsk, [73,87]                                                  |                   |                    | <LOD–368<br>200–733<br><LOD–125<br><LOD<br><LOD<br><LOD<br><LOD<br><LOD–190<br><LOD                                                                                                                                                                                                              | Vistula [75,91]<br>Odra, [75,91]<br>Warta, [75,91]<br>Brda, [75,91]<br>Kłodnica, [75,91]<br>Krzywa, [75,91]<br>Mała Panew, [75,91]<br>Troja, [75,91]<br>Toszecki Stream, [75,91]                                                                                                                                                                                                                                                                                                                                                                                                                         |                        |                                                | 33.3–33.3                                                  | Gdańsk, [73]                                                                                                    | 38.7–38.7       | Gdańsk, [73]                          |
| Nonsteroidal anti–<br>inflammatory drugs | 5–Aminosalicylic acid |                                                                                      |                                                                                                                                    |                                                               |                                                                                                               |                   |                    | <LOQ                                                                                                                                                                                                                                                                                             | Warta, [98]                                                                                                                                                                                                                                                                                                                                                                                                                                                                                                                                                                                              |                        |                                                |                                                            |                                                                                                                 |                 |                                       |
|                                          | Acetylsalicylic acid  |                                                                                      |                                                                                                                                    | <LOD<br><LOD                                                  | Kraków, [92]<br>Bielsko–Biała, [75,91]                                                                        |                   |                    | <LOD<br><LOD<br><LOD<br><LOD–400<br>730<br><LOD<br><LOD<br><LOD<br><LOD<br><LOD<br><LOD<br><LOD<br><LOD<br><LOD<br><LOQ–29.13<br>19.25–78.24<br><LOQ–43.18<br>37.16–54.36                                                                                                                        | Drwęca, [100]<br>Wkra, [100]<br>Mławka, [100]<br>Vistula [80,91]<br>Odra, [91]<br>Warta, [91]<br>Brda, [91]<br>Kłodnica, [91]<br>Krzywa, [91]<br>Mała Panew, [91]<br>Troja, [91]<br>Toszecki Stream, [91]<br>Wierzycza, [80]<br>Łeba, [80]<br>Dębogórze Canal, [80]<br>Kozi Bród, [80]                                                                                                                                                                                                                                                                                                                   |                        |                                                |                                                            |                                                                                                                 |                 |                                       |
|                                          | Diclofenac            | 249–40,570.2<br>>LOD–2000<br>2500–4410<br>988<br>1457<br><LOD–11,720<br>556.2–4001.4 | Kraków, [71,84,85]<br>Zabrze, [76]<br>Poznań, [44]<br>Lublin, [17]<br>Szczecin, [17]<br>not given, [50,78]<br>Gdańsk,[17,83,73,87] | 525–2905.9<br>128–160<br>120–5401.5<br>1090–2890<br><LOD–3180 | Kraków,[71,84,85,92,93]<br>Bielsko–Biała, [75,91]<br>Gdańsk, [73,83,87]<br>Poznań, [44]<br>not given, [50,78] | 2100–108,340      | NE Poland, [50]    | <LOD–183.9<br>0.3–1.3<br><LOD–3.1<br>1.2–1.7<br>0.4–0.8<br>1.1–2.6<br><LOQ–486<br>429–470<br><LOQ–42<br>57–70<br>174–200<br><LOD<br>170–186<br>305–320<br>5<br><LOD–390<br>528<br><LOD<br><LOD–20.40<br><LOQ–63.98<br><LOQ–54.36<br><LOQ<br><LOQ<br><LOQ<br>666.3–1352.6<br><LOD<br><LOD<br><LOD | Vistula, [43,71,75,80,91]<br>Pszczynka, [43]<br>Czarna Przemsza, [43]<br>Rawa, [43]<br>Brynica, [43]<br>Biała Przemsza, [43]<br>Warta, [44,81,91,99,103]<br>Odra, [75,91]<br>Brda, [75,91]<br>Kłodnica, [75,91]<br>Krzywa, [75,91]<br>Mała Panew, [75,91]<br>Troja, [92]<br>Toszecki Stream, [75,91]<br>Cybina, [103]<br>Radunia, [102,105]<br>Gdańsk Lake, [102]<br>Somonino Lake, [102]<br>Wierzycza, [80,87]<br>Łeba, [80]<br>Dębogórze Canal, [80]<br>Kozi Bród, [80]<br>Czarniawka, [104]<br>Gliwice/Zabrze Lake, [104]<br>Drwina, [71]<br>Reda, [101]<br>Zagórska Struga, [101]<br>Płutnica, [101] | <LOD–102<br><LOD–195.7 | Gulf of Gdańsk, [83,102]<br>Bay of Puck, [101] | <LOD–42<br><LOD–28.6<br><LOQ–99<br><LOD–2770<br><LOD–606.1 | not given, [28,109,110]<br>Gdańsk, [105]<br>Krajkowo, [81,99]<br>NE Poland, [50,111]<br>Bay of Puck area, [101] | 4<br><LOD–114.3 | Poznań, [103]<br>Gdańsk, [73,102,105] |
|                                          | Diffunisal            | <LOD                                                                                 | Gdańsk, [87]                                                                                                                       | <LOD                                                          | Gdańsk, [87]                                                                                                  |                   |                    | 95–123<br>85<br><LOD<br><LOD                                                                                                                                                                                                                                                                     | Radunia, [102]<br>Gdańsk Lake, [102]<br>Somonino Lake, [102]<br>Wierzycza, [878]                                                                                                                                                                                                                                                                                                                                                                                                                                                                                                                         | 38–62                  | Gulf of Gdańsk, [102]                          |                                                            |                                                                                                                 | <LOD            | Gdańsk, [102]                         |
|                                          | Fenoprofen            | 62.8–62.8<br><LOD–81.1<br><LOD                                                       | Koziegłowy,[86,79]<br>Poznań, [86]<br>Zabrze, [76]                                                                                 | <LOD–28.3                                                     | Koziegłowy, [79,86]                                                                                           |                   |                    | 55–84<br>24<br>20<br>0.2–58.9                                                                                                                                                                                                                                                                    | Radunia, [102]<br>Gdańsk Lake, [102]<br>Somonino Lake, [102]<br>Warta, [86]                                                                                                                                                                                                                                                                                                                                                                                                                                                                                                                              | <LOD                   | Gulf of Gdańsk, [102]                          |                                                            |                                                                                                                 | <LOD            | Gdańsk, [102]                         |
|                                          | Flurbiprofen          | <LOD–4952                                                                            | Gdańsk, [83,87]                                                                                                                    | <LOD                                                          | Gdańsk, [83,87]                                                                                               |                   |                    | <LOD–<LOQ<br><LOD                                                                                                                                                                                                                                                                                | Radunia, [105]<br>Wierzycza, [87]                                                                                                                                                                                                                                                                                                                                                                                                                                                                                                                                                                        | <LOD–87                | Gulf of Gdańsk, [83]                           | <LOD–22<br><LOD–<LOQ                                       | not given, [28,109,110]<br>Gdańsk, [105]                                                                        | <LOD            | Gdańsk, [105]                         |

| PPCP group                                   | Compound     | Raw wastewater                                                                                   |                                                                                                                                                              | Treated wastewater                                                                   |                                                                                                                                                                   | Landfill leachate |                    | Surface water                                                                                                                                                                                                                                                      |                                                                                                                                                                                                                                                                                                                                                                                                                                                                                                                                             | Seawater        |                                            | Groundwater                                   |                                                                                          | Drinking water     |                                         |
|----------------------------------------------|--------------|--------------------------------------------------------------------------------------------------|--------------------------------------------------------------------------------------------------------------------------------------------------------------|--------------------------------------------------------------------------------------|-------------------------------------------------------------------------------------------------------------------------------------------------------------------|-------------------|--------------------|--------------------------------------------------------------------------------------------------------------------------------------------------------------------------------------------------------------------------------------------------------------------|---------------------------------------------------------------------------------------------------------------------------------------------------------------------------------------------------------------------------------------------------------------------------------------------------------------------------------------------------------------------------------------------------------------------------------------------------------------------------------------------------------------------------------------------|-----------------|--------------------------------------------|-----------------------------------------------|------------------------------------------------------------------------------------------|--------------------|-----------------------------------------|
|                                              |              | ng/L                                                                                             | Location, [source]                                                                                                                                           | ng/L                                                                                 | Location, [source]                                                                                                                                                | ng/L              | Location, [source] | ng/L                                                                                                                                                                                                                                                               | Location, [source]                                                                                                                                                                                                                                                                                                                                                                                                                                                                                                                          | ng/L            | Location, [source]                         | ng/L                                          | Location, [source]                                                                       | ng/L               | Location, [source]                      |
| Nonsteroidal anti-inflammatory drugs (cont.) | Ibuprofen    | 2496–11,426.7<br>>LOD–2800<br><LOD–10,864<br>6040–6450<br>649<br>894<br>4000–4000<br><LOD–31,250 | Kraków, [71,84]<br>Zabrze, [76]<br>Gdańsk,[17,73,82,83,87]<br>Poznań, [44]<br>Lublin, [17]<br>Szczecin, [17]<br>Koziegłowy, [79,86]<br>not given, [78,86]    | <LOD–76.9<br><LOD –679<br><LOQ–125<br>412<br>516<br><LOD<br><LOD–22,610<br>1,2–101.1 | Kraków, [71,84,92]<br>Gdańsk, [17,73,82,83,87]<br>Poznań, [44]<br>Lublin, [17]<br>Szczecin, [17]<br>Bielsko–Biała, [75]<br>not given, [78]<br>Koziegłowy, [79,86] |                   |                    | <LOD–84.5<br>5–8<br>1–31<br>17–25<br>14–25<br>3–7<br><LOD–496<br><LOQ<br><LOD<br>104<br>55<br>LOD–55.4<br><LOD<br><LOD<br><LOD<br><LOD<br><LOD<br><LOD<br><LOD<br><LOD<br><LOD<br>48.30<br>16.97–64.01<br>39.64–49.35<br><LOQ<br><LOQ<br>75.9–3730.1               | Vistula, [43,71,75,80]<br>Pszczynka, [43]<br>Czarna Przemsza, [43]<br>Rawa, [43]<br>Brynica, [43]<br>Biała Przemsza, [43]<br>Warta, [44,63,75,81,86,103]<br>Cybina, [103]<br>Radunia, [102]<br>Gdańsk Lake, [102]<br>Somonino Lake, [102]<br>Radunia, [82,105]<br>Odra, [75]<br>Brda, [75]<br>Kłodnica, [75]<br>Krzywa, [75]<br>Mała Panew, [75]<br>Troja, [75]<br>Toszecki Stream, [75]<br>Wierzycza, [81,87]<br>Łeba, [80]<br>Dębogórze Canal, [80]<br>Kozi Bród, [80]<br>Czarniawka, [104]<br>Gliwice/Zabrze Lake, [104]<br>Drwina, [71] | <LOQ–48         | Gulf of Gdańsk, [83,102]                   | <LOD–599<br><LOQ–40<br><LOD–295.5             | not given, [28,109,110]<br>Krajkowo, [63,81]<br>Gdańsk, [73,105]                         | 5<br><LOD–223.6    | Poznań, [103]<br>Gdańsk,[73,82,102,105] |
|                                              | Indomethacin | >LOD–420                                                                                         | Zabrze, [76]                                                                                                                                                 |                                                                                      |                                                                                                                                                                   |                   |                    | <LOQ<br><LOQ–22.14<br><LOQ–27.13<br><LOQ–18.06<br><LOQ–31.07                                                                                                                                                                                                       | Wierzycza, [80]<br>Vistula, [80]<br>Łeba, [80]<br>Dębogórze Canal, [80]<br>Kozi Bród, [80]                                                                                                                                                                                                                                                                                                                                                                                                                                                  |                 |                                            |                                               |                                                                                          |                    |                                         |
|                                              | Ketoprofen   | 508–21,679.3<br><LOD–4569<br>>LOD–2300<br>316<br>437<br>2500–2500<br><LOD–9200<br><LOD–233,630   | Kraków, [71,84,85]<br>Gdańsk, [17,73,82,83,87]<br>Zabrze, [76]<br>Lublin, [17]<br>Szczecin, [17]<br>Koziegłowy,[79,86]<br>Poznań, [44,86]<br>not given, [78] | 81–485<br><LOD–3095<br>90–220<br>87<br>62<br>52<br><LOD<br><LOD–335.1                | Kraków, [71,84,85]<br>Gdańsk, [17,73,82,83,87]<br>Poznań, [44]<br>Lublin, [17]<br>Szczecin, [17]<br>Bielsko–Biała, [75]<br>not given, [78]<br>Koziegłowy, [79,86] |                   |                    | <LOD–44<br>0.8–1.4<br><LOD–3.1<br>2.9–7.2<br>1.1–2.9<br>0.2–0.9<br><LOD–47.9<br><LOD<br><LOD<br><LOD<br><LOD<br><LOD–>LOD<br>258<br><LOD<br><LOD<br><LOD<br><LOD<br><LOD<br><LOD<br><LOD<br>18.09<br>34.06<br>19.07<br>36.02<br>5.8–100.5<br>87.7<br>132.2<br>81.9 | Vistula, [43,71,75,80]<br>Pszczynka, [43]<br>Czarna Przemsza, [43]<br>Rawa, [43]<br>Brynica, [43]<br>Biała Przemsza, [43]<br>Warta, [44,75,86,81,103]<br>Drwęca, [100]<br>Wkra, [100]<br>Mławka, [100]<br>Cybina, [103]<br>Radunia, [82,105]<br>Odra, [75]<br>Brda, [75]<br>Kłodnica, [75]<br>Krzywa, [75]<br>Mała Panew, [75]<br>Troja, [75]<br>Toszecki Stream, [75]<br>Wierzycza, [80,87]<br>Łeba, [80]<br>Dębogórze Canal, [80]<br>Kozi Bród, [80]<br>Drwina, [71]<br>Reda, [101]<br>Zagórska Struga, [101]<br>Płutnica, [101]          | 364–616<br><LOD | Gulf of Gdańsk, [83]<br>Bay of Puck, [101] | <LOD–>LOD<br><LOQ<br><LOD–165.9<br><LOD–731.8 | not given, [28,109,110]<br>Krajkowo, [81]<br>Gdańsk, [73,105]<br>Bay of Puck, area [101] | <LOD<br><LOD–166.9 | Poznań, [103]<br>Gdańsk,[82,73,105]     |
|                                              | Ketorolac    |                                                                                                  |                                                                                                                                                              |                                                                                      |                                                                                                                                                                   |                   |                    | <LOQ–21.14<br><LOQ–37.19<br>13.99–27.13<br><LOQ–24.05<br><LOQ–42.15                                                                                                                                                                                                | Wierzycza, [80]<br>Vistula, [80]<br>Łeba, [80]<br>Dębogórze Canal, [80]<br>Kozi Bród, [80]                                                                                                                                                                                                                                                                                                                                                                                                                                                  |                 |                                            |                                               |                                                                                          |                    |                                         |

| PPCP group                                   | Compound       | Raw wastewater                                                                                  |                                                                                                                                                        | Treated wastewater                                                            |                                                                                                                                                                | Landfill leachate |                    | Surface water                                                                                                                                                                                              |                                                                                                                                                                                                                                                                                                                                                                                            | Seawater |                          | Groundwater                       |                                                               | Drinking water  |                                    |
|----------------------------------------------|----------------|-------------------------------------------------------------------------------------------------|--------------------------------------------------------------------------------------------------------------------------------------------------------|-------------------------------------------------------------------------------|----------------------------------------------------------------------------------------------------------------------------------------------------------------|-------------------|--------------------|------------------------------------------------------------------------------------------------------------------------------------------------------------------------------------------------------------|--------------------------------------------------------------------------------------------------------------------------------------------------------------------------------------------------------------------------------------------------------------------------------------------------------------------------------------------------------------------------------------------|----------|--------------------------|-----------------------------------|---------------------------------------------------------------|-----------------|------------------------------------|
|                                              |                | ng/L                                                                                            | Location, [source]                                                                                                                                     | ng/L                                                                          | Location, [source]                                                                                                                                             | ng/L              | Location, [source] | ng/L                                                                                                                                                                                                       | Location, [source]                                                                                                                                                                                                                                                                                                                                                                         | ng/L     | Location, [source]       | ng/L                              | Location, [source]                                            | ng/L            | Location, [source]                 |
| Nonsteroidal anti-inflammatory drugs (cont.) | Naproxen       | 696–177,704.2<br>>LOD–8400<br>240–7040<br>0.5–10,380<br>414<br>662<br>2700–2700<br><LOD–551,960 | Kraków, [71,84,85]<br>Zabrze, [76]<br>Gdańsk, [17,83,87]<br>Poznań, [44,86]<br>Lublin, [17]<br>Szczecin, [17]<br>Koziegłowy,[79,86]<br>not given, [78] | 54.8–313<br>82–110<br>70–2512<br>27–145<br>56<br>74<br><LOD–7760<br>0.2–156.5 | Kraków, [71,84,85]<br>Bielsko–Biała, [75,91]<br>Gdańsk, [17,83,87]<br>Poznań, [44]<br>Lublin, [17]<br>Szczecin, [17]<br>not given, [78]<br>Koziegłowy, [79,86] |                   |                    | <LOQ–143<br><LOD–300<br>128–140<br>143–180<br>753–850<br><LOQ–40<br>88–110<br>187–240<br><LOD<br>14<br><LOD<br><LOD<br><LOD–37.7<br><LOD–47.98<br><LOQ–88.01<br>21.63–80.14<br>41.19–69.30<br>233.3–1091.9 | Warta,[44,75,81,86,91,99,103]<br>Vistula [71,75,80,91]<br>Odra, [75,91]<br>Brda, [75,91]<br>Kłodnica, [75,91]<br>Krzywa, [75,91]<br>Mała Panew, [75,91]<br>Troja, [75,91]<br>Toszecki Stream, [75,91]<br>Cybina, [103]<br>Gdańsk Lake, [102]<br>Somonino Lake, [102]<br>Radunia, [102,105]<br>Wierzyca, [80,87]<br>Łeba, [80]<br>Dębogórze Canal, [80]<br>Kości Bród, [80]<br>Drwina, [71] | <LOD–171 | Gulf of Gdańsk, [83,102] | <LOD–>LOD<br><LOD–20.8<br><LOQ–21 | not given, [28,109,110]<br>Gdańsk, [105]<br>Krajkowo, [81,99] | 13<br><LOD–<LOQ | Poznań, [103]<br>Gdańsk, [102,105] |
|                                              | Phenazone      | <LOD–180                                                                                        | Zabrze, [76]                                                                                                                                           |                                                                               |                                                                                                                                                                |                   |                    | <LOQ                                                                                                                                                                                                       | Warta, [81]                                                                                                                                                                                                                                                                                                                                                                                |          |                          | <LOQ                              | Krajkowo, [81]                                                |                 |                                    |
|                                              | Propyphenazone | <LOD                                                                                            | Zabrze, [76]                                                                                                                                           |                                                                               |                                                                                                                                                                |                   |                    | <LOQ                                                                                                                                                                                                       | Warta, [81]                                                                                                                                                                                                                                                                                                                                                                                |          |                          | <LOQ                              | Krajkowo, [81]                                                |                 |                                    |
|                                              | Tolmetin       | 76                                                                                              | Koziegłowy,[86]                                                                                                                                        | 6.6                                                                           | Koziegłowy, [86]                                                                                                                                               |                   |                    | <LOD<br><LOD<br><LOD                                                                                                                                                                                       | Radunia, [102]<br>Gdańsk Lake, [102]<br>Somonino Lake, [102]                                                                                                                                                                                                                                                                                                                               | <LOD     | Gulf of Gdańsk, [102]    |                                   |                                                               | <LOD            | Gdańsk, [102]                      |
| Painkillers                                  | Codeine        | 68.5–139.5                                                                                      | Kraków, [71]                                                                                                                                           | 69.5–89.3                                                                     | Kraków, [71]                                                                                                                                                   |                   |                    | <LOQ–15<br><LOQ<br><LOQ–9.5<br><LOQ<br><LOQ<br><LOQ<br>29–81.5                                                                                                                                             | Warta, [98]<br>Wierzyca, [80]<br>Vistula, [71,80]<br>Łeba, [80]<br>Dębogórze Canal, [80]<br>Kości Bród, [80]<br>Drwina, [71]                                                                                                                                                                                                                                                               |          |                          |                                   |                                                               |                 |                                    |
|                                              | Hydrocodone    | <LOQ                                                                                            | Kraków, [71]                                                                                                                                           | <LOQ                                                                          | Kraków, [71]                                                                                                                                                   |                   |                    | <LOQ–9.13<br><LOQ–21.05<br><LOQ–35.18<br><LOQ–18.09<br><LOQ–28.91                                                                                                                                          | Wierzyca, [80]<br>Vistula, [80]<br>Łeba, [80]<br>Dębogórze Canal, [80]<br>Kości Bród, [80]                                                                                                                                                                                                                                                                                                 |          |                          |                                   |                                                               |                 |                                    |
|                                              | Ketamine       | <LOQ–29                                                                                         | Kraków, [71]                                                                                                                                           | 1.5–3.5                                                                       | Kraków, [71]                                                                                                                                                   |                   |                    | 1–4.5<br><LOQ                                                                                                                                                                                              | Drwina, [71]<br>Vistula, [71]                                                                                                                                                                                                                                                                                                                                                              |          |                          |                                   |                                                               |                 |                                    |
|                                              | Metamizole     |                                                                                                 |                                                                                                                                                        | <LOD–152                                                                      | Bielsko–Biała, [75,91]                                                                                                                                         |                   |                    | <LOD<br>900–902<br><LOD<br><LOD<br><LOD<br><LOD<br><LOD<br><LOD<br><LOD                                                                                                                                    | Vistula [75,91]<br>Odra, [75,91]<br>Warta, [75,91]<br>Brda, [75,91]<br>Kłodnica, [75,91]<br>Krzywa, [75,91]<br>Mała Panew, [75,91]<br>Troja, [75,91]<br>Toszecki Stream, [75,91]                                                                                                                                                                                                           |          |                          |                                   |                                                               |                 |                                    |
|                                              | Methadone      | <LOQ–46.3                                                                                       | Kraków, [71]                                                                                                                                           | <LOQ–11                                                                       | Kraków, [71]                                                                                                                                                   |                   |                    | 0.5–10.5<br><LOQ                                                                                                                                                                                           | Drwina, [71]<br>Vistula, [71]                                                                                                                                                                                                                                                                                                                                                              |          |                          |                                   |                                                               |                 |                                    |
|                                              | Morphine       | 38.5–63.5                                                                                       | Kraków, [71]                                                                                                                                           | 8.8–17.8                                                                      | Kraków, [71]                                                                                                                                                   |                   |                    | 11.5–29<br>2–3                                                                                                                                                                                             | Drwina, [71]<br>Vistula, [71]                                                                                                                                                                                                                                                                                                                                                              |          |                          |                                   |                                                               |                 |                                    |
|                                              | Oxycodone      | <LOQ                                                                                            | Kraków, [71]                                                                                                                                           | <LOQ                                                                          | Kraków, [71]                                                                                                                                                   |                   |                    |                                                                                                                                                                                                            |                                                                                                                                                                                                                                                                                                                                                                                            |          |                          |                                   |                                                               |                 |                                    |
|                                              | Oxymorphone    | <LOQ                                                                                            | Kraków, [71]                                                                                                                                           | <LOQ                                                                          | Kraków, [71]                                                                                                                                                   |                   |                    |                                                                                                                                                                                                            |                                                                                                                                                                                                                                                                                                                                                                                            |          |                          |                                   |                                                               |                 |                                    |
|                                              | Paracetamol    | 51400–51,400<br>2.24–16,350<br><LOD–28,254.4                                                    | Koziegłowy,[79,86]<br>Poznań, [86]<br>Gdańsk, [73,83,87]                                                                                               | <LOD<br>1.5–174.8<br><LOD–3824                                                | Bielsko–Biała, [75,91]<br>Koziegłowy, [86]<br>Gdańsk, [73,83,86]                                                                                               |                   |                    | <LOD<br><LOD<br><LOD<br><LOD–70.13<br><LOD–21<br><LOD–337.7<br><LOD<br><LOD<br><LOD<br><LOD<br><LOD<br><LOD<br>LOD–89.6<br><LOD–96.14<br>15.09–28.94<br>29.81–52.81<br><LOQ–46.92                          | Drwęca, [100]<br>Wkra, [100]<br>Mławka, [100]<br>Vistula [75,80,91]<br>Odra, [75,91]<br>Warta, [75,86,91,98]<br>Brda, [75,91]<br>Kłodnica, [75,91]<br>Krzywa, [75,91]<br>Mała Panew, [75,91]<br>Troja, [75,91]<br>Toszecki Stream, [75,91]<br>Radunia, [105]<br>Wierzyca, [80,87]<br>Łeba, [80]<br>Dębogórze Canal, [80]<br>Kości Bród, [80]                                               | <LOD–201 | Gulf of Gdańsk, [83]     | <LOD–>LOD<br><LOD–113.1           | not given, [28,109,110]<br>Gdańsk, [73,105]                   | <LOD–172.7      | Gdańsk, [73,105]                   |

| PPCP group             | Compound                       | Raw wastewater                                           |                                                                                   | Treated wastewater                     |                                                                   | Landfill leachate |                    | Surface water                                                                                                                             |                                                                                                                                                                                                                              | Seawater |                    | Groundwater                                     |                                                                                  | Drinking water |                    |
|------------------------|--------------------------------|----------------------------------------------------------|-----------------------------------------------------------------------------------|----------------------------------------|-------------------------------------------------------------------|-------------------|--------------------|-------------------------------------------------------------------------------------------------------------------------------------------|------------------------------------------------------------------------------------------------------------------------------------------------------------------------------------------------------------------------------|----------|--------------------|-------------------------------------------------|----------------------------------------------------------------------------------|----------------|--------------------|
|                        |                                | ng/L                                                     | Location, [source]                                                                | ng/L                                   | Location, [source]                                                | ng/L              | Location, [source] | ng/L                                                                                                                                      | Location, [source]                                                                                                                                                                                                           | ng/L     | Location, [source] | ng/L                                            | Location, [source]                                                               | ng/L           | Location, [source] |
| Painkillers<br>(cont.) | Pentoxifylline                 | >LOD–680                                                 | Zabrze, [76]                                                                      |                                        |                                                                   |                   |                    |                                                                                                                                           |                                                                                                                                                                                                                              |          |                    |                                                 |                                                                                  |                |                    |
|                        | Tramadol                       |                                                          |                                                                                   |                                        |                                                                   |                   |                    | 52–2108<br>167–468.5<br>50–71                                                                                                             | Warta, [81,98]<br>Drwina, [71]<br>Vistula, [71]                                                                                                                                                                              |          |                    | <LOQ–73.7                                       | Krajkowo, [81]                                                                   |                |                    |
| PDE5 inhibitors        | Sildenafil                     | <LOQ–39.8                                                | Kraków, [71]                                                                      | <LOQ                                   | Kraków, [71]                                                      |                   |                    | <LOQ–38.15<br><LOQ–32.30<br>18.14–23.15<br><LOQ–19.07<br><LOQ–81.17                                                                       | Wierzyca, [80]<br>Vistula, [80]<br>Łeba, [80]<br>Dębogórze Canal, [80]<br>Kozi Bród, [80]                                                                                                                                    |          |                    |                                                 |                                                                                  |                |                    |
|                        | Vardenafil                     | <LOQ<br><LOD–2620                                        | Kraków, [71]<br>not given, [50]                                                   | <LOQ<br><LOD–1150                      | Kraków, [71]<br>not given, [50]                                   |                   |                    |                                                                                                                                           |                                                                                                                                                                                                                              |          |                    |                                                 |                                                                                  |                |                    |
| Repellents             | DEET                           |                                                          |                                                                                   |                                        |                                                                   | <LOD–<br>202,420  | NE Poland, [49,50] | <LOQ–64.17<br><LOQ–136.88<br><LOQ–66.84<br><LOQ–81.97<br>39.07–69.79                                                                      | Wierzyca, [80]<br>Vistula, [80]<br>Łeba, [80]<br>Dębogórze Canal, [80]<br>Kozi Bród, [80]                                                                                                                                    |          |                    | <LOD–17,280                                     | NE Poland, [49,50,111]                                                           |                |                    |
| Stimulants             | 4–MEC                          |                                                          |                                                                                   | 29.1–41.3                              | Kraków, [94]                                                      |                   |                    |                                                                                                                                           |                                                                                                                                                                                                                              |          |                    |                                                 |                                                                                  |                |                    |
|                        | Amphetamine                    | 94–270                                                   | Kraków, [71]                                                                      | <LOQ                                   | Kraków, [71]                                                      |                   |                    | <LOQ                                                                                                                                      | Warta, [98]                                                                                                                                                                                                                  |          |                    |                                                 |                                                                                  |                |                    |
|                        | Benzylpiperazine               | <LOQ                                                     | Kraków, [71]                                                                      | <LOQ–20.3                              | Kraków, [71]                                                      |                   |                    |                                                                                                                                           |                                                                                                                                                                                                                              |          |                    |                                                 |                                                                                  |                |                    |
|                        | Caffeine                       | 970<br>764<br>1262–22,193.8<br>32,438.3–89,544.5<br><LOD | Lublin, [17]<br>Szczecin, [17]<br>Gdańsk, [17,73]<br>Kraków, [71]<br>Zabrze, [76] | 94<br>315<br>47.2–442.1<br>20.3–2868.5 | Lublin, [17]<br>Szczecin, [17]<br>Gdańsk, [17,73]<br>Kraków, [71] |                   |                    | <LOQ–1350<br>25.12–1712<br>367.1<br>326.4<br><LOQ–34.16<br><LOQ–19.31<br><LOQ–63.74<br>40.82–59.12<br>84–29,995.5<br>92.9<br><LOD<br><LOD | Warta, [63,81]<br>Vistula, [55,80,84]<br>Rudawa, [97]<br>Wilga, [97]<br>Wierzyca, [80]<br>Łeba, [80]<br>Dębogórze Canal, [80]<br>Kozi Bród, [80]<br>Drwina, [71]<br>Reda, [101]<br>Zagórska Struga, [101]<br>Płutnica, [101] | <LOD     | Bay of Puck, [101] | <LOQ–140<br><LOD–>LOD<br>21.9–308<br><LOD–873.3 | Krajkowo, [81,99]<br>not given, [109]<br>Gdańsk, [73]<br>Bay of Puck area, [101] | 12.7–158.7     | Gdańsk, [73]       |
|                        | Cocaine                        | 48.3–188.8                                               | Kraków, [71]                                                                      | <LOQ–3.8                               | Kraków, [71]                                                      |                   |                    | <LOQ<br>1.5–37.5<br>0.5–1                                                                                                                 | Warta, [98]<br>Drwina, [71]<br>Vistula, [71]                                                                                                                                                                                 |          |                    |                                                 |                                                                                  |                |                    |
|                        | mCCP                           |                                                          |                                                                                   | <LOD                                   | Kraków, [94]                                                      |                   |                    |                                                                                                                                           |                                                                                                                                                                                                                              |          |                    |                                                 |                                                                                  |                |                    |
|                        | MDA                            | <LOQ                                                     | Kraków, [71]                                                                      | <LOQ                                   | Kraków, [71]                                                      |                   |                    |                                                                                                                                           |                                                                                                                                                                                                                              |          |                    |                                                 |                                                                                  |                |                    |
|                        | MDEA                           | <LOQ                                                     | Kraków, [71]                                                                      | <LOQ                                   | Kraków, [71]                                                      |                   |                    |                                                                                                                                           |                                                                                                                                                                                                                              |          |                    |                                                 |                                                                                  |                |                    |
|                        | MDMA                           | 16.3–86.3                                                | Kraków, [71]                                                                      | 9.3–44.3                               | Kraków, [71,94]                                                   |                   |                    | 12.5–48.5<br>0.5–102                                                                                                                      | Drwina, [71]<br>Vistula, [71]                                                                                                                                                                                                |          |                    |                                                 |                                                                                  |                |                    |
|                        | MDPV                           |                                                          |                                                                                   | <LOD                                   | Kraków, [94]                                                      |                   |                    |                                                                                                                                           |                                                                                                                                                                                                                              |          |                    |                                                 |                                                                                  |                |                    |
|                        | Mephedrone                     | <LOQ–52                                                  | Kraków, [71]                                                                      | <LOQ–29.8                              | Kraków, [71]                                                      |                   |                    |                                                                                                                                           |                                                                                                                                                                                                                              |          |                    |                                                 |                                                                                  |                |                    |
|                        | Methamphetamine                | <LOQ                                                     | Kraków, [71]                                                                      | <LOQ                                   | Kraków, [71]                                                      |                   |                    |                                                                                                                                           |                                                                                                                                                                                                                              |          |                    |                                                 |                                                                                  |                |                    |
|                        | MPD                            |                                                          |                                                                                   | 21.6–42.9                              | Kraków, [94]                                                      |                   |                    |                                                                                                                                           |                                                                                                                                                                                                                              |          |                    |                                                 |                                                                                  |                |                    |
|                        | Nicotine                       | 19,035–423,978                                           | Kraków, [71]                                                                      | 25.5–2222.5                            | Kraków, [71]                                                      |                   |                    | 11–8187<br>14–614.5                                                                                                                       | Drwina, [71]<br>Vistula, [71]                                                                                                                                                                                                |          |                    |                                                 |                                                                                  |                |                    |
|                        | PMA                            | 147–438.5                                                | Kraków, [71]                                                                      | 15.8–107                               | Kraków, [71]                                                      |                   |                    |                                                                                                                                           |                                                                                                                                                                                                                              |          |                    |                                                 |                                                                                  |                |                    |
|                        | Theophylline                   |                                                          |                                                                                   |                                        |                                                                   |                   |                    | <LOQ–19.04<br><LOQ–34.82<br><LOQ<br><LOQ–21.47<br><LOQ                                                                                    | Wierzyca, [80]<br>Vistula, [80]<br>Łeba, [80]<br>Dębogórze Canal, [80]<br>Kozi Bród, [80]                                                                                                                                    |          |                    |                                                 |                                                                                  |                |                    |
| Sugar substitutes      | Saccharin                      |                                                          |                                                                                   |                                        |                                                                   |                   |                    | <LOQ–360                                                                                                                                  | Warta, [81]                                                                                                                                                                                                                  |          |                    | <LOQ                                            | Krajkowo, [81]                                                                   |                |                    |
|                        | Sucralose                      |                                                          |                                                                                   |                                        |                                                                   |                   |                    | <LOQ<br>40                                                                                                                                | Warta, [81]<br>Warta, [63]                                                                                                                                                                                                   |          |                    | <LOQ–55                                         | Krajkowo, [63]                                                                   |                |                    |
| Synthetic musks        | Galaxolide                     | >LOD–1200                                                | Zabrze, [76]                                                                      |                                        |                                                                   |                   |                    |                                                                                                                                           |                                                                                                                                                                                                                              |          |                    |                                                 |                                                                                  |                |                    |
|                        | Tonalide                       | <LOD                                                     | Zabrze, [76]                                                                      |                                        |                                                                   |                   |                    |                                                                                                                                           |                                                                                                                                                                                                                              |          |                    |                                                 |                                                                                  |                |                    |
| UV filters             | 3–(4–Methylbenzylidene)camphor | <LOD–18,010                                              | not given, [50]                                                                   | <LOD                                   | not given, [50]                                                   | <LOD–16,640       | NE Poland, [49,50] |                                                                                                                                           |                                                                                                                                                                                                                              |          |                    | <LOD–3625                                       | NE Poland, [49,50,111]                                                           |                |                    |
|                        | Benzophenone                   | <LOD–2320                                                | not given, [50]                                                                   | <LOD–1400                              | not given, [50]                                                   | <LOD–5940         | NE Poland, [49,50] |                                                                                                                                           |                                                                                                                                                                                                                              |          |                    | <LOD–3450                                       | NE Poland, [49,50,111]                                                           |                |                    |
|                        | Oxybenzone                     |                                                          |                                                                                   |                                        |                                                                   |                   |                    | <LOQ–26.51<br><LOQ–73.15<br>19.60–47.19<br><LOQ–39.08<br>24.17–64.01                                                                      | Wierzyca, [80]<br>Vistula, [80]<br>Łeba, [80]<br>Dębogórze Canal, [80]<br>Kozi Bród, [80]                                                                                                                                    |          |                    |                                                 |                                                                                  |                |                    |
| Vasodilators           | Nafronyl                       | 23.5–27.9                                                | Gdańsk, [73]                                                                      | 12.2–13.9                              | Gdańsk, [73]                                                      |                   |                    |                                                                                                                                           |                                                                                                                                                                                                                              |          |                    | 0.2–0.3                                         | Gdańsk, [73]                                                                     | 1–3.8          | Gdańsk, [73]       |

**Explanations:**

- <LOD—below the established limit of detection
- <LOQ—below the established limit of quantification
- >LOD—above the established limit of detection (detailed information on PPCP concentration was not given)

PPCPs concentrations presented in the table are ranges of minimum and maximum values found in the literature.  
Locations reported as “not given” imply that the sampling area/region was not specified in the study or the research concerned sampling across Poland.  
Locations for “surface water” refer to the names of the rivers or streams.  
Blanks in the table imply that no information was found under the review.  
Sources are in accordance with the references in the related publication.
